1 **Dual RNAseq highlights the kinetics of skin microbiome and fish host responsiveness to**  
2 **bacterial infection**

3 J. Le Luyer<sup>1,\*</sup>, Q. Schull<sup>1,2</sup>, P. Auffret<sup>1</sup>, P. Lopez<sup>1,3</sup>, M. Crusot<sup>1,4</sup>, C. Belliard<sup>1</sup>, C. Basset<sup>1</sup>, Q.  
4 Carradec<sup>5</sup>, J. Poulain<sup>5</sup>, S. Planes<sup>6</sup>, D. Saulnier<sup>1</sup>

5

6 <sup>1</sup> Ifremer, IRD, Institut Louis-Malardé, Univ Polynésie française, EIO, F-98719 Taravao,  
7 Tahiti, Polynésie française, France

8 <sup>2</sup> MARBEC, Univ. Montpellier, Ifremer, IRD, CNRS, F-34200, Sète, France

9 <sup>3</sup> Virologie et Immunologie Moléculaires, Institut National de la Recherche Agronomique,  
10 Université Paris-Saclay, Jouy-en-Josas, France

11 <sup>4</sup> Univ Polynésie française, Ifremer, IRD, Institut Louis-Malardé, EIO, F-98702 Fa'a, Tahiti,  
12 Polynésie française, France

13 <sup>5</sup> Génomique Métabolique, Genoscope, Institut François Jacob, CEA, CNRS, Univ Evry,  
14 Université Paris-Saclay, 91057 Evry, France

15 <sup>6</sup> USR 3278 CRIOBE, EPHE-UPVD-CNRS, Univ. de Perpignan, France

16

17

18 **Author for correspondance** \*: J. Le Luyer; e-mail: [Jeremy.le.luyer@ifremer.fr](mailto:Jeremy.le.luyer@ifremer.fr)

19 **Keywords:** Microbiome – Gene expression – 16S rRNA – Nanopore – *Tenacibaculum*  
20 *maritimum* – Co-infection

21

22 **Abstract** (350 words)

23 **a) Background**

24 *Tenacibaculum maritimum* is a worldwide-distributed fish pathogen known for causing  
25 dramatic damages on a broad range of wild and farmed marine fish populations. Recently  
26 sequenced genome of *T. maritimum* strain NCIMB 2154<sup>T</sup> provided unprecedented  
27 information on the possible molecular mechanisms involved in virulence for this species.  
28 However, little is known on the dynamic on the infection *in vivo*, and information are lacking  
29 on both the intrinsic host response (gene expression) and its associated microbiome  
30 community. Here, we applied complementary omic approaches, including dual RNAseq and  
31 16S rRNA gene metabarcoding sequencing using Nanopore and short-reads Illumina  
32 technologies to unravel the host-pathogens interplay in experimental infection system using  
33 the tropical fish *Platax orbicularis* as model.

34 **b) Results**

35 We show that *T. maritimum* transcriptomic landscape during infection is characterized by an  
36 enhancement of antibiotic catalytic and glucan catalytic functions while decreasing specific  
37 sulphate assimilation process, compared to *in vitro* cultures. Simultaneously, fish host display  
38 a large palette of immune effectors, notably involving innate response and triggering acute  
39 inflammatory response. In addition, results suggest that fish activate adaptive immune  
40 response visible through stimulation of T-helper cells, Th17, with congruent reduction of Th2  
41 and T-regulatory cells. Fish were however largely sensitive to infection, and less than 25% of  
42 them survived after 96hpi. These surviving fish showed no evidence of stress (cortisol levels)  
43 as well as no significant difference in microbiome diversity compared to control at the same  
44 sampling time. The presence of *Tenacibaculum* in resistant fish skin and the total absence of  
45 any skin lesion suggest that these fish did not escape contact with the pathogen but rather  
46 prevent the pathogen entry. In these individuals we detected the up-regulation of specific

47 immune-related genes differentiating resistant from control at 96hpi, which suggests a  
48 possible genomic basis of resistance while no genetic variations in coding regions was  
49 reported.

### 50 **c) Conclusion**

51 Here we refine the interplay between common fish pathogens and host immune response  
52 during experimental infection. We further highlight key actors of defense response,  
53 pathogenicity and possible genomic bases of resistance to *T. maritimum*.

54

55

## 56 **Background**

57 Pathogens remain a significant threat to biodiversity, livestock farming and human health [1].  
58 Host–pathogen interactions rely on a complex balance between host defenses and pathogen  
59 virulence. Through constant selective pressure, pathogens evolve mechanisms in order to  
60 overcome the host immune system, likewise the host adapt to counteract and limit pathogen  
61 virulence. Although changes in gene expression as a result of host–pathogen interactions  
62 appear to be common [2–4], the mechanisms involved often remain poorly understood. A  
63 more in-depth understanding of host–pathogen interactions has the potential to improve our  
64 mechanistic understanding of pathogenicity and virulence, thereby defining novel preventive,  
65 therapeutic and vaccine targets [5].

66 Dual RNAseq sequencing strategy fills the need of simultaneously assess the host and the  
67 pathogens genes expression [6–8]. Studies applying these approaches in fish bacterial  
68 infection systems have bloomed recently and show promising in deciphering the complexity  
69 of host-pathogen interplay [9–11] yet, these studies did not simultaneously explore dysbiosis  
70 and associated changes of microbiome communities. In nature, co-occurrence of multiple  
71 pathogen species (co-infection) is frequent. Species interactions might be neutral, antagonistic  
72 or facilitative and most often shape strain virulence plasticity resulting in increased disease  
73 virulence [12–14]. Despite its commonness, remarkably few studies have explored such  
74 models, *i.e.* when host interact simultaneously with multiple pathogens co-infection [15].  
75 During tenacibaculosis outbreak in platax, *T. maritimum* burden is also commonly associated  
76 with other pathogen co-occurrences, namely *Vibrio* spp [16]. Nevertheless, such approach is  
77 dramatically impaired by the unbalanced representation of each compartment sequences, most  
78 often favouring the host compartment [8,17]. This bias can be minimized by specific library  
79 preparation (*i.e.* mRNA depletion), *in silico* normalization procedures, and/or by investigating  
80 models where pathogens burden is high.



81

82 *Tenacibaculum maritimum* is a worldwide-distributed fish pathogen, known for its lethal  
83 consequences on a broad range of wild and farmed marine fish populations. Major efforts  
84 have been undertaken to lessen the effect of the pathogen and/or increase fish immune  
85 resistance [18], yet the mechanisms of the infection and the response of fish remain largely  
86 unknown which significantly hold back development of aquaculture sectors. Nevertheless,  
87 recent sequencing of *T. maritimum* strain NCIMB 2154<sup>T</sup> genome provided unprecedented  
88 information on the putative molecular mechanisms involved in virulence [19]. Authors note  
89 for instance that *T. maritimum* display a large array of evolutionary conserved stress  
90 resistance related effectors as well as expanded capacity of iron mobilisation [19].

91 *Tenacibaculum maritimum* adheres and rapidly colonizes mucosal surfaces [16,20]. Infected  
92 fish show multiplication of *T. maritimum* on their external tissues leading to severe skin  
93 lesions and following fish rapid death [16]. Therefore, as for other infection systems, the  
94 mucosal surfaces, here mainly skin mucus, is considered as the first barrier against pathogens  
95 [21]. This physical and chemical barrier constituted by mucus also includes the presence of  
96 host immune effectors (innate and adaptive) that orchestrate a complex interaction network  
97 between with the commensal bacterial community [22,23]. The identification of these multi-  
98 specific interactions within the mucus brings to the fore the microbiome as the cornerstone of  
99 host-pathogen interactions [21,24]. Indeed, dysbiosis (i.e., the imbalance or alteration of the  
100 microbial ecosystem leading to a diseased status) is directly involved in the severity of a  
101 disease [25–27]. Recent studies on zebrafish (*Danio rerio*) raised in axenic conditions or in  
102 the presence of probiotic bacteria underlined the crucial role of the microbiota on the  
103 development of the immune system, mucosal homeostasis and resistance to stress and  
104 pathogens ([28], for review see [29]).

105 In French Polynesia, recurrent tenacibaculosis infections have been the major obstacle to local  
106 fish production sustainability. Indeed, *T. maritimum* affects the only locally farmed fish, the  
107 Orbicular batfish (*Platax orbicularis*) leading to very high mortality rates shortly after  
108 transferring hatchery fingerlings to off-shore marine cages. Here we combined dual RNAseq  
109 and 16S rRNA metabarcoding sequencing approaches to investigate the molecular responses  
110 of the host and the microbiome communities (genes expression and microbiome composition)  
111 simultaneously during the infection and the recovery phases to *T. maritimum* using the  
112 orbicular batfish as a model. We also integrated comparison to *in vitro* liquid cultures of *T.*  
113 *maritimum* to refine our knowledge of virulence-related genes and explored genomic and  
114 genetic bases of resistance in *P. orbicularis*.

## 115 **Methods**

### 116 **a) Animal husbandry**

117 Platax fingerlings used in the bacterial challenge were 58 days old (days post-hatching; dph).  
118 Fish were obtained from a mass tank spawning of 6 females and 8 males induced by  
119 desalinisation. Broodstock include wild individuals caught in French Polynesia that has been  
120 maintained at the Centre Ifremer du Pacifique (CIP) hatchery facility for seven years, under  
121 the supervision of the direction des ressources marines (DRM). Eggs were randomly  
122 distributed into six black circular fiberglass tanks of 210 L with 50 eggs.L<sup>-1</sup> in order to  
123 achieve an average density of 30 larvae.L<sup>-1</sup>. Half of the tank were then reared in conditions  
124 that followed standard procedures implemented in the CIP facility (open water system,  
125 normal salinity around 36 psu), named “Standard” [18]. The other half was reared in  
126 conditions that were supposed to be optimal according to previous experiments, named  
127 “Recirculated”. Indeed, animals were bred in a recirculating system which was desalinated to  
128 24 psu until day 34 where salinity was progressively raised to normal (36 psu). Moreover,  
129 commercial clay (Clay Bacter ®) was added daily at a rate of 1g/d/m<sup>3</sup> per percent of hourly

130 water renewal from day 1 to day 19, the beginning of living prey weaning period. In addition,  
131 an input of probiotic *Pseudoalteromonas piscicida* B1 (local strain), produced in CIP facilities  
132 (see supplementary methods), was realised daily in fish fed (0.5mL/day/tank) and in the water  
133 (0.5 ml/day/tank) at a concentration of  $10^9$ cfu/ml of bacterial suspension from day 1 to day  
134 57. At the end of the larval phase, day 20, 700 fingerlings/tank were randomly kept. When  
135 they reached an average weight of 1g, they were sorted to get rid of the queue and head batch  
136 and kept at a density of 200/tank (1g/L). It is however relevant mentioning that around day  
137 40, fish started to show a decrease of appetite and heavy mucus losses even if there was no  
138 mortality, mainly in the recirculating system. After an analysis of water flora, it was shown  
139 that *Vibrio harveyi* was present but no *T. maritimum*.

140 Platax larvae were fed 4 times a day with living preys (*Brachonius sp.* and *Artemia spp.*)  
141 before being weaned from day 16 to 23. Fingerlings were then fed with commercial micro-  
142 pellets ranging from 0,3 to 1 mm for the range Micro-Gemma and Gemma (Skretting,  
143 Stavanger, Norway) and 1-1.3 mm for Ridley (Le Gouessant, Lamballe, France) according to  
144 the standard previously established [18]. Seawater provided to both systems was pumped  
145 from the lagoon, filtered with 300  $\mu$ m sand filter and two 25 and 10  $\mu$ m mesh filters and UV  
146 treated (300 mJ/cm<sup>2</sup>). Recirculating system included a 500L biological filter to regulate level  
147 of ammonia and nitrite. All tanks were supplied with saltwater held at  $28,4 \pm 0,3^\circ\text{C}$  at  
148 constant photoperiod (12L: 12D) and oxygen saturation was maintained above 60% in the  
149 tanks with air distributed via air stone. Water renewal ranged from 36 to 360 L/h and new  
150 water input in the recirculating system was of  $11 \pm 1$  %. Levels of ammonia and nitrite were  
151 monitored once a week by spectrophotometry (HANNA Instruments ®) to assess bio filter  
152 performance. Temperature, salinity and dissolved oxygen were measured daily (YSI ®) and  
153 the unfed and fecal materials were removed once a day.

#### 154 **b) Bacterial challenge**

155 We used strain TF4 for the experimental infection on 58 dph fingerlings. TFA4 strain was  
156 isolated from the skin of an infected *Platax orbicularis* in French Polynesia in 2013 and was  
157 shown to belong to *Tenacibaculum maritimum* by whole-genome sequencing, displaying an  
158 average nucleotide identity of 99.6 % with the reference strain NCIMB 2154<sup>T</sup> [30]. TFA4  
159 strain was cultivated in nutrient Zobell medium (4 g L<sup>-1</sup> peptone and 1g L<sup>-1</sup> yeast extract  
160 Becton, Dickinson and Company, Sparks, MD in filtered and UV-treated sea water) under  
161 constant agitation (200 rpm) at 27°C for 48h. On the infection day, 50 juvenile *Platax*  
162 *orbicularis* were transferred into 40 L-tanks supplied with air and infected by an addition of  
163 10 mL of bacterial suspension of TFA4 strain in the tank water. Final bacterial concentration  
164 in the 40 L-tanks tanks, determined by “plate-counting” method, reached 4.10<sup>4</sup> CFU.mL<sup>-1</sup>.  
165 Moreover, for each rearing condition, 16 to 17 fish were randomly selected from each tank to  
166 be transferred in one 40L-tank to form mock-treated group, referred as control (N = 50 fish)  
167 and an addition of 10 mL of Zobell medium was done. After 2 hours of bathing, fish were  
168 caught with a net, rinsed by successive passage in two buckets of 40L filled with clean  
169 filtered UV-treated seawater, before being transferred back into their respective tanks. Twice  
170 a day, one third of the water was changed with filtered UV-treated seawater to maintain good  
171 water quality and be able to inactivate *T. maritimum* in sewage by bleach treatment.  
172 Moreover, at those times, dead animals were collected and recorded. After 115 hours post-  
173 infection (hpi), all infected animals were considered as survivors and the challenge ended. All  
174 the remaining fish were euthanized.

### 175 **c) Animal sampling**

176 We randomly sampled five individuals per tank at 58 dph (average weight of 7.21g ± 0.28 se).  
177 Sampling used for the experiment consisted in five individuals per tank at 24hpi and 96hpi  
178 (Figure 1A). To increase our sampling dataset for controls we included “standard” control  
179 group (see previous section, one tank) together with “recirculated” condition (one tank)  
180 individuals. Consequently, our design consisted in four groups, namely *control*<sub>24h</sub> (N=10

181 individuals, replicates tanks), *control*<sub>96h</sub> (N=10 individuals, replicates tanks), *infected*<sub>24h</sub> (N=15  
 182 individuals, triplicates tanks) and *resistant*<sub>96h</sub> (N=15 individuals, triplicates tanks). For each  
 183 sampling, at 24hpi and 96hpi, individuals were lethally anaesthetized using benzocaine bath  
 184 (150 mg.L<sup>-1</sup>) and a lateral photograph was taken using a digital fixed camera (Leica  
 185 Microsystems; Figure 1B and C). Microbiome and host sampling consisted in gentle fish skin  
 186 smears with sterile swabs. Swabs were directly placed in TRIZOL Reagent (Life  
 187 Technologies) on ice to prevent RNA degradation. Swabs were disrupted using a mixer mill  
 188 MM200 (Retsch) for 5 min at a frequency of 30 Hz and stocked at -80°C for latter analysis. In  
 189 parallel, water was also sampled in each tank but was not included in the analysis due to very  
 190 low DNA yield.

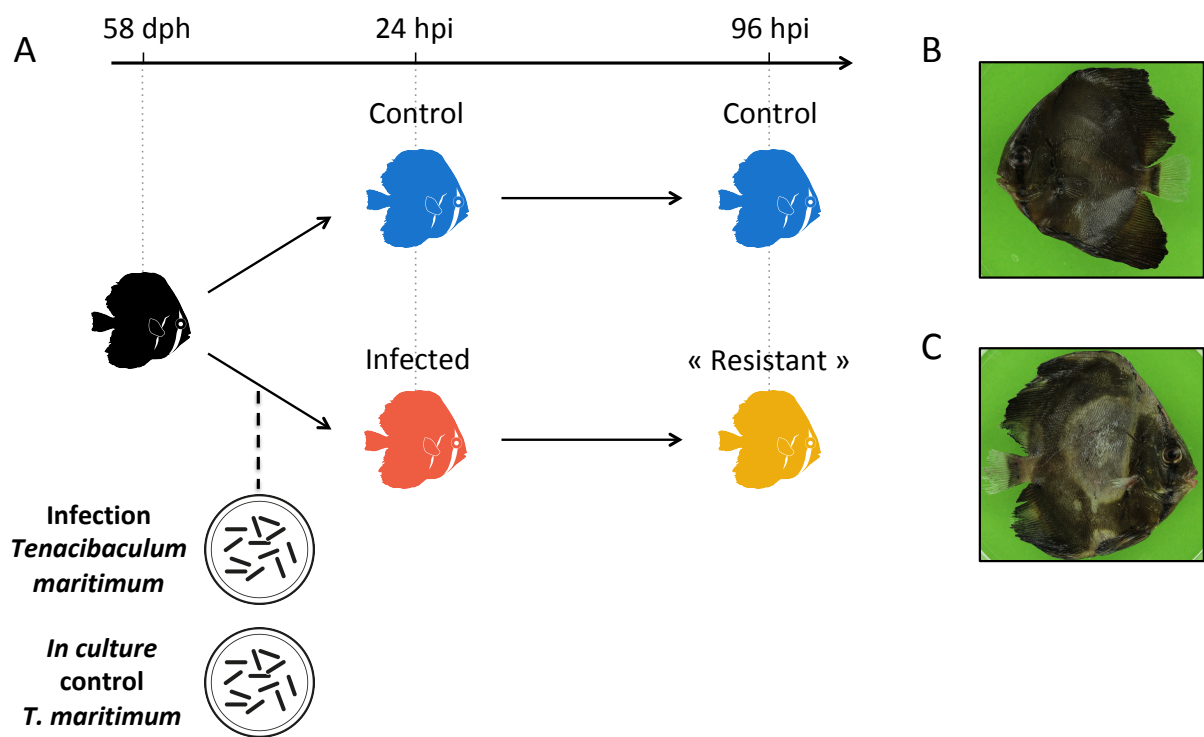

191

192 **Figure 1: Experimental design and individuals' photographs.** A) Experimental infection  
 193 was conducted at 58 dph, after random sampling of five individuals per tank to assess initial  
 194 weight. At 24 and 96 hours hpi, five individuals per tank (N= 15 individuals, *infected*<sub>24h</sub>; N =  
 195 15 individuals, *resistant*<sub>96h</sub>; N = 10 individuals, *control*<sub>24h</sub> and N = 10 individuals, *control*<sub>96h</sub>)  
 196 were sampled by swabs. Same individuals serve for host and microbiome transcriptomic and  
 197 for microbiome metabarcoding. B) Photograph of control fish (*control*<sub>24h</sub>); C) Photographs of  
 198 infected fish (*infected*<sub>24h</sub>) showing typical skin lesions associated with tenacibaculosis.

199

**d) *T. maritimum* in vitro liquid culture sampling.**

200 The TFA4 strain was cultivated in 6 mL of Zobell medium under constant agitation (200 rpm)  
201 at 27°C for 48h, following exact same procedure and time of incubation than the culture used  
202 for bacterial challenge. Five culture replicates were performed. For each replicate, 4 mL at  
203  $10^8$  CFU/mL were centrifuged 5 min. at 10,000g and at room temperature. Three inox beads  
204 and 2 mL of TRIZOL (Life technologies) were quickly added to each bacterial pellet and cells  
205 were immediately disrupted using a mixer mill MM200 (Retsch) for 5 min. at a frequency of  
206 30 Hz to prevent RNA degradation. RNA was extracted following manufacturer' instructions,  
207 using a high salt precipitation procedure (0.8 M sodium citrate and 1.2 M NaCl per 1 ml of  
208 TRIZOL reagent used for the homogenization) in order to reduce proteoglycan and  
209 polysaccharide contaminations. Quantity, integrity and purity of total RNA were validated by  
210 both Nanodrop readings (NanoDrop Technologies Inc.) and BioAnalyzer 2100 (Agilent  
211 Technologies). DNA contaminants were removed using a DNase RNase-free kit (Ambion).  
212 A total of five RNA samples ( $1.048 \pm 0.019$   $\mu$ g) were further dried in RNA-stable solution  
213 (ThermoFisher Scientific) following manufacturer's recommendations and shipped at room  
214 temperature to McGill sequencing platform services (Montreal, Canada). One library was  
215 removed prior sequencing because it did not meet the minimal quality requirements.

#### 216 e) Fish mortality and cortisol measurements

217 Mortality was recorded at 0, 19, 24, 43, 48, 67, 72, 91, 96 and 115hpi. We used the non-  
218 parametric Kaplan-Meier approach for estimating log-rank values implemented in the survival  
219 R package [31]. Differences in survival probability was considered significant for  $P < 0.05$ .  
220 We assessed stress levels in fish by measuring scale cortisol content [32]. The scales of both  
221 flanks of each individual were collected, and subsequently washed and vortexed three times  
222 (2.5 min; 96% isopropanol) in order to remove external cortisol that takes its source in mucus.  
223 Residual solvent traces were evaporated under nitrogen flux and samples frozen at -80°C. To  
224 ensure scales were dry, they were lyophilized for 12 hours before being grounded to a powder  
225 using a ball mill (MM400, Retsch GmbH, Germany). Cortisol content was extracted from ~50

226 mg of dry scale powder by incubation in 1.5mL of methanol (MeOH) on a 30°C rocking  
227 shaker during 18 hr. After centrifugation at 9500g for 10 min, the supernatant was evaporated  
228 a rotary evaporator and reconstituted with 0.2 mL of EIA buffer provided by the Cortisol  
229 assay kit (Neogen® Corporation Europe, Ayr, UK). Cortisol concentrations were determined  
230 in 50 µL of extracted cortisol by using a competitive EIA kits (Neogen® Corporation Europe,  
231 Ayr, UK) according to previously published protocol [33]. Differences across groups were  
232 tested by a two-way ANOVA and following Tukey's HSD post-hoc after validation of  
233 normality and homoscedasticity. Differences were considered significant when  $P < 0.05$ .

#### 234 **f) RNA and DNA extraction and sequencing**

235 **Dual RNAseq.** Total RNA was extracted using the same procedure than described above.  
236 RNA was then dried in RNA-stable solution (ThermoFisher Scientific) following  
237 manufacturer's recommendations and shipped at room temperature to McGill sequencing  
238 platform services (Montreal, Canada). Ribo-Zero rRNA removal kit (Illumina, San 260  
239 Diego, Ca, USA) was used to prepare mRNA, rRNA-depleted, libraries that were multiplexed  
240 (13-14 samples by lane) and sequenced on HiSeq4000 100-bp paired-end (PE) sequencing  
241 device. Infected individuals 24hpi were sequenced twice for insuring sufficient coverage  
242 (Table S1).

243 **Short-reads 16S rRNA MiSeq microbiome sequencing.** Total DNA was extracted from the  
244 same TRIZOL Reagent (Life Technologies) mix than described above. DNA  
245 quantity/integrity and purity were validated using both a Nanodrop (NanoDrop Technologies  
246 Inc.) and a BioAnalyzer 2100 (Agilent Technologies). The V4 region was amplified by PCR  
247 using modified 515F/806rb primers constructs (515F: 5'-GTGYCAGCMGCCGCGGTAA-3';  
248 806rb: 5'- GGACTACNVGGGTWTCTAAT-3'), recommended for microbial survey [34].  
249 Amplicons libraries were multiplexed and sequenced on a single lane of MiSeq 250bp PE

250 Illumina machine at Genome Québec McGill, Canada. Details of sequencing statistics are  
251 provided in Table S2.

252 **Full 16S rRNA Nanopore sequencing.** For a broad range amplification of the 16S rRNA  
253 gene, DNA was amplified using the 27F/1492R barcoded primers products (27F: 5'-  
254 AGAGTTTGATCMTGGCTCAG-3'; 1492R: 5'- TACGGYTACCTTGTTACGACTT-3').  
255 We included in the PCR experiment eight randomly selected individuals from *infected<sub>24h</sub>*  
256 group, two negative PCR controls (clean water) and one positive control (Acinetobacter  
257 DNA).

258 The PCR mixtures (25 µl final volume) contain 10 ng of total DNA template or 10 µl of  
259 water, with 0.4 µM final concentration of each primer, 3% of DMSO and 1X Phusion Master  
260 Mix (ThermoFisher Scientific, Waltham, MA, USA). PCR amplifications (98 °C for 2 min;  
261 30 cycles of 30 s at 98 °C, 30 s at 55 °C, 1 min at 72 °C; and 72 °C for 10 min) of all samples  
262 were carried out in triplicate in order to smooth the intra-sample variance. Triplicates of PCR  
263 products were pooled and purified by 1x AMPure XP beads (Beckmann Coulter Genomics)  
264 cleanup. Amplicon lengths were measured on an Agilent Bioanalyzer using the DNA High  
265 Sensitivity LabChip kit then quantified with a Qubit Fluorometer.

266 An equimolar pool of purified PCR products (excepted for negative controls) was done and  
267 one sequencing library was finally prepared from 100 ng of the pool using the 1D Native  
268 barcoding genomic DNA protocol (with EXP-NBD103 and SQK-LSK108) for R7.9 flow  
269 cells run (FLO-MAP107) then sequenced on the MinION device. Details of sequencing  
270 statistics are provided in Supplementary Material.

## 271 **g) Microbiome communities analyses**

272 **Microbiome dynamics with MiSeq short-reads dataset.** Raw reads were filtered to remove  
273 Illumina's adaptors as well as for quality and length using Trimmomatic v.0.36 [35] with  
274 minimum length, trailing, and leading quality parameters set to 100 bp, 20, and 20,



275 respectively. Remaining reads were analysed with functions implemented in QIIME2  
276 platform v2019.10. Briefly, we used DADA2 algorithm [36] to cluster sequences in amplicon  
277 sequence variants (ASVs). The following ASVs were mapped against GreenGenes v13.9 99%  
278 OTUs database [37]. We explored alpha-diversity [Shannon, Fisher and Faith's phylogenetic  
279 diversity (PD) indexes] and beta-diversity (Bray-Curtis, unweighted and weighted Unifrac  
280 distances) using phyloseq R package [38]. Dissimilarity between samples was assessed by  
281 principal coordinates analysis (PCoA). Differences in alpha-diversity were tested using  
282 pairwise Wilcoxon rank test and were considered significant when  $P < 0.01$ . Differences in  
283 beta-diversity were tested using PERMANOVA (999 permutations) as implemented in the  
284 adonis function of the vegan R package [39] and were considered significant when  $P < 0.01$ .  
285 We also searched for « core » microbiome in fish skin and considered as member of core  
286 microbiome ASVs that were present in all the individuals across all condition (infected,  
287 control and resistant). We finally searched for significant differences in specific ASV  
288 abundance across groups using Wald tests implemented in the DESeq2 R package [40]. We  
289 used 'apeglm' method for Log2FC shrinkage to account for dispersion and variation of effect  
290 size across individuals and conditions, respectively [41]. Differences were considered  
291 significant when  $FDR < 0.01$  and  $|FC| > 2$ .

292 **Microbiome diversity analysis with the Nanopore dataset.** Sequences were called during  
293 the MinION run with the MinKnow software (v. 1.7.14). The demultiplexing and adaptor  
294 trimming were done with porechop tool (<https://github.com/rrwick/Porechop>) with the option  
295 discard\_middle. For each barcode, all nanopore reads were mapped on the GreenGenes  
296 database (v.13.5, <http://greengenes.lbl.gov>) with minimap2 (v2.0-r191) with the pre-set  
297 options "map-ont" [42] . All reference sequences of the GreenGenes database covered by  
298 more than 0.01% of all read were kept for the next step. A second round of mapping (same  
299 parameters) was done on the selected references in order to aggregate reads potentially mis-  
300 assigned during the first round of mapping. SAMtools and BCFtools were used to reconstruct

301 consensus sequences for each reference sequence covered with more than 10 nanopore reads  
302 with the following programs and options: mpileup -B -a -Q 0 -u; bcftools call -c --ploidy  
303 1;vcfutils.pl vcf2fastq. Individuals and consensus sequences were blast against NCBI nt  
304 database (e-value < 10<sup>-5</sup>).

#### 305 **h) Compartment specific differential expression analyses**

306 **Reads pre-processing.** For each individual, raw reads were filtered using Trimmomatic  
307 v0.36 [43], with minimum length (60bp), trailing and leading (20 and 20; respectively).  
308 Filtered PE reads were mapped against a combined reference including the host's  
309 transcriptome (See supplementary material for details of the transcriptome assembly; Table  
310 S1 and S3) and the genomes of *Alteromonas mediterranea* strain: AltDE1 (Genbank  
311 accession: GCA\_000310085.1), and *Pseudoalteromonas phenolica* strain: KCTC 12086  
312 (Genbank accession: GCA\_001444405.1), *Tenacibaculum maritimum* strain: NCIMB 2154T  
313 (Genbank accession: GCA\_900119795.1), *Sphingobium yanoikuyae* strain ATCC 51230  
314 (Genbank accession: GCA\_000315525.1), *Vibrio alginolyticus* strain: ATCC 17749  
315 (Genbank accession: GCA\_000354175.2,) and *Vibrio harveyi* strain: ATCC 43516 (Genbank  
316 accession: GCA\_001558435.2). To prevent multi-mapping biases we used GSNAP v2017-03-  
317 17 [44] with minimum coverage fixed at 0.9, maximum mismatches allowed of 5 and  
318 removing non-properly paired and non-uniquely mapped reads (option "concordant\_uniq").  
319 Low mapping quality (MAPQ) were further removed using Samtools v1.4.1 [45] with  
320 minimum MAPQ threshold fixed at 5. A matrix of raw counts was built using HTSeq-count  
321 v0.9.1 [46]. Transcripts from host and bacteria species origin were then separated in different  
322 contingency tables using homemade scripts.

323 **Host transcriptome analysis.** Low coverage transcripts with count per million (CPM) < 1 in  
324 at least 9 individuals were removed, resulting in a total of 22,390 transcripts. Similarly,  
325 transcripts over-representation was assessed using 'majSequences.R' implemented in

326 SARTools suite [47]. We used distance-based redundant discriminant analysis (db-RDA) to  
327 document genetic variation among groups and correlation with condition (infected or control),  
328 weight and time (24 and 96hpi) as the explanatory variables. Briefly, we computed  
329 Euclidean's distances and PCoA using 'daisy' and 'pcoa' functions, respectively,  
330 implemented in the ape R package [48]. PCo factors (n = 6) were selected based on a broken-  
331 stick approach [49,50] and used to produce a db-RDA. Partial db-RDAs were used to assess  
332 the factor effect, controlling for the other factor variables. We tested the models and  
333 individual factors significance using 999 permutations. The effect was considered significant  
334 when  $P < 0.01$ .

335 Differential expression was assessed using the DESeq2 R package [40] using pairwise  
336 comparisons with Wald test. Logarithmic fold change (logFC) were shrunk using 'apeglm'  
337 method, implemented in DESeq2 R package [40], to account for dispersion and effect size  
338 across individuals and conditions [41]. Differences were considered significant when FDR <  
339 0.01 and FC > 2. Group comparisons included *infected*<sub>24h</sub> vs *control*<sub>24h</sub> and *resistant*<sub>96h</sub> vs  
340 *control*<sub>96h</sub>. Gene ontology (GO) enrichment was tested using GOAtools v0.6.5 [51] and the  
341 go-basic.obo database (release 2017-04-14) using Fisher's test. Our background list included  
342 the ensemble of genes in the host transcriptome. Only GO terms with Bonferroni adjusted  $P <$   
343 0.01 and including at least three differentially expressed genes were considered. Significant  
344 GO enriched terms were used for semantic-based clustering in REVIGO  
345 (<http://revigo.irb.hr/>).

346 ***Tenacibaculum maritimum* gene expression *in vitro* or during infection.** A validation step  
347 for searching for transcripts over-representation was assessed using 'majSequences.R'  
348 implemented in SARTools suite [47], similarly to the fish transcriptome. Most represented  
349 sequences were attributed to *ssrA* coding genes, but represents less than 8% of the total  
350 library. We applied similar shrinkage method and pairwise comparisons (infected vs. *in vitro*).  
351 We used more stringent thresholds for the *T. maritimum* than for the host, as commonly

352 observed in similar studies [8], and considered significant differences when FDR < 0.01 and  
353 FC > 4. Gene ontology (GO) enrichment was similar to the methods used for the host.

354 **i) Species specific weighted co-network gene expression analyses.**

355 We built a series of signed weighted co-expression network for the host and the bacteria  
356 compartments (using only for *infected*<sub>24h</sub> individuals for including *V. harveyi*, *T. maritimum*  
357 and *P. phenolica*, independently) to cluster co-expressed genes and identify putative driver  
358 genes using WGCNA R package [52]. Variation in normalized counts were prior controlled  
359 using ‘*vst*’ method implemented in DESeq2 R package [40].

360 **Host WGCNA analysis.** We reduced the expression noise in the dataset by retaining only  
361 transcripts with minimum overall variance (> 5%). Briefly, we fixed a soft threshold power of  
362 14 using the scale-free topology criterion to reach a model fit ( $|R|$ ) of 0.80. The modules were  
363 defined using the ‘*cutreeDynamic*’ function (minimum 30 genes by module and default  
364 cutting-height = 0.99) based on the topological overlap matrix, a module Eigengene distance  
365 threshold of 0.25 was used to merge highly similar modules. For each module we defined the  
366 module membership (kME, correlation between module Eigengene value and gene expression  
367 values). We looked for significant correlation (Pearson’s correlation;  $P < 0.001$ ) modules  
368 against physiological data including cortisol levels (pg.mg<sup>-1</sup> of scales), fish weight (g) and  
369 condition (coded “1” for *control*<sub>24h</sub>, *control*<sub>96h</sub> and *resistant*<sub>96h</sub> and “2” for *infected*<sub>24h</sub>  
370 condition, respectively). Gene ontology (GO) enrichment for each module was tested using  
371 same protocol and parameters than described above.

372 ***T. maritimum* WGCNA analyses.** Briefly, we conducted species-specific weighted co-  
373 expression network analyses and used bacterial species and host module eigenvalue to  
374 correlate genes modules. We fixed a soft threshold power of 20 using the scale-free topology  
375 criterion to reach a model fit ( $|R|$ ) of 0.85. The modules were defined using the  
376 ‘*cutreeDynamic*’ function (minimum 30 genes by module and default cutting-height = 0.99)

377 based on the topological overlap matrix, a module Eigengene distance threshold of 0.3 was  
378 used to merge highly similar modules. For each module we defined the module membership  
379 (kME, correlation between module Eigengene value and gene expression values). Individual  
380 module Eigengene values were computed using the *'moduleEigengenes'* and used as metadata  
381 for further downstream correlation analyses. We finally computed a correlation matrix and  
382 focused on genes showing significant correlation ( $P < 0.05$ ) to host main modules  
383 eigenvalues, namely  $\text{module}_{\text{host-turquoise}}$  and  $\text{module}_{\text{host-blue}}$ . Gene ontology (GO) enrichment for  
384 each list of genes was tested using same protocol and parameters than described above.

#### 385 **j) The genetic bases of fish resistance**

386 We further explored the putative genetic variation between resistant and infected fish. We  
387 choose to focus on resistant fish because of their established phenotype, (*i.e.* survivor with no  
388 sign of lesions after bacterial challenge). We followed GATK recommendations for SNPs  
389 identification based on RNAseq data. Briefly, BAM files were pre-treated using *'CleanSam'*  
390 function, duplicates were notified with the *'MarkDuplicates'* function, and cigar string  
391 splitted with *'SplitNCigarReads'* function. All functions are implemented in GATK v4.0.3.0  
392 software [53,54]. Final SNPs calling was conducted with Freebayes v1.1.0  
393 (<https://github.com/ekg/freebayes>) requiring minimum coverage of 15 and minimum mapping  
394 quality of 20, forcing ploidy at 2 and removing indels (*'--no-indels'*) and complex  
395 polymorphisms (*'--no-complex'*). The raw VCF file was filtered for minimum allele  
396 frequency (*'--min\_maf=0.2'*), minimum coverage (*'--minDP=20'*) and allowing no missing  
397 data using Vcftools v0.1.14 [55]. We computed relatedness (*'--relatedness2'*) within and  
398 among groups with Vcftools v0.1.14 [55]. We further used distance-based redundant  
399 discriminant analysis (db-RDA) to document genetic variation among groups and correlation  
400 with cortisol and condition and weight as the explanatory variables. Briefly, we computed  
401 Euclidean's distances and PCoA using *'daisy'* and *'pcoa'* functions, respectively,  
402 implemented in the ape R package [48]. PCo factors ( $n = 6$ ) were selected based on a broken-

403 stick approach [49,50] and used to produce a db-RDA. We tested the model significance  
404 using 999 permutations, effect was considered significant when  $P < 0.01$ .

## 405 **Results**

406 We compared infected (with *T. maritimum* TF4 strain) to mock-treated *P. orbicularis* groups  
407 (thereafter referred as control) in experimental infection conditions and individuals were  
408 sampled at 24 and 96 hpi. Surviving individuals in infected groups at 96hpi are referred as  
409 ‘resistant’ fish. Sampling consisted in individual skin swab for later DNA and RNA  
410 extraction. DNA served to assess microbiome communities (using 16S rRNA and nanopore  
411 technologies) while RNA served for genes expression analysis of the microbiome and the fish  
412 simultaneously (dual RNAseq). In addition, we compared genes expression of *T.maritimum*  
413 during the infection in vivo to in vitro liquid culture to detect putative virulence factors. Fish  
414 condition, survival and cortisol levels were also monitored.

### 415 **a) Fish weight, cortisol levels and mortality**

416 Mortality rate in challenged fish reached  $77.36 \pm 18.35$  (standard error; se) while no mortality  
417 was observed in control group (Kaplan-Meier analysis,  $P < 0.001$ ; Figure 2A). Mortality  
418 started at 24hpi in infected group and no novel mortality even was observed after 72hpi.  
419 Cortisol levels in fish scales significantly vary across groups (ANOVA;  $F = 9.46$ ;  $P < 0.01$ ;  
420 Figure 2B). Overall cortisol levels were higher in the *infected*<sub>24h</sub> group compared to all others  
421 groups (Tukey ‘s HSD;  $P = 0.01$ ). Cortisol levels in *control*<sub>24h</sub> group were also higher than  
422 both *control*<sub>96h</sub> and *resistant*<sub>96h</sub> groups (Tukey’s HSD; respectively  $t = -3.28$ ;  $P = 0.01$  and  $t =$   
423  $-3.42$ ;  $P < 0.01$ ). However, no difference was observed between *control*<sub>96h</sub> and *resistant*<sub>96h</sub>  
424 groups (Tukey’s HSD;  $t = 0.12$ ;  $P = 0.99$ ).

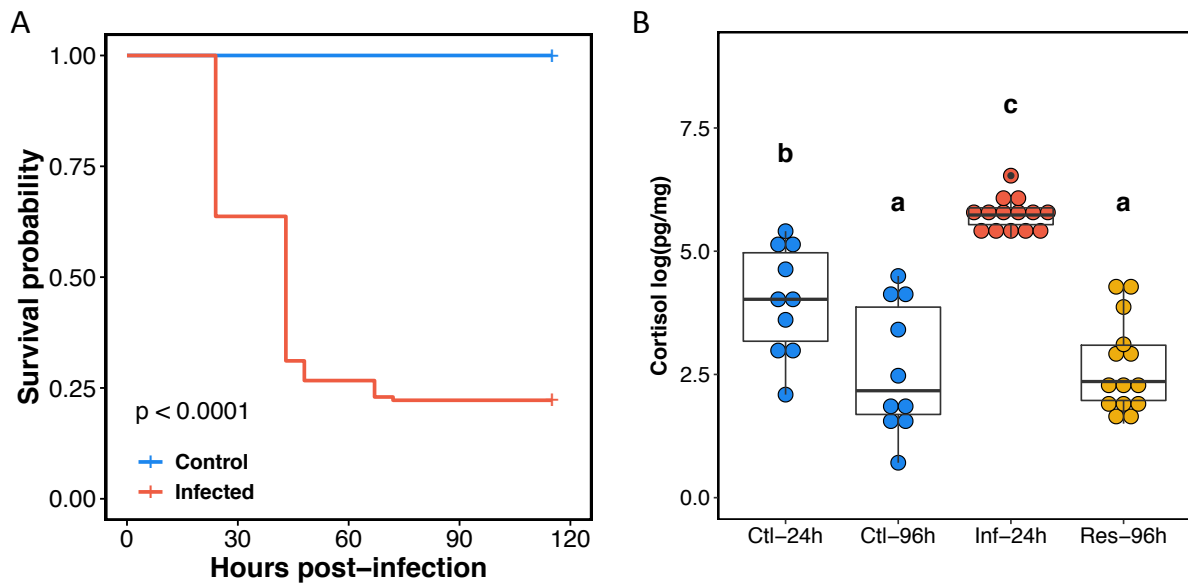

425

426 **Figure 2: Kaplan Meier survivals estimates and scales cortisol levels.** **A)** Kaplan–Meier  
 427 survival curves for control (blue) and infected (red) groups over the 115hpi of the experiment.  
 428 Survival was monitored at 0,19, 24, 43, 48, 67, 72, 91, 96 and 115hpi. **B)** Scale cortisol levels  
 429 are expressed on a logarithmic (Log10) scale. Ctl-24h: *control*<sub>24h</sub>; Ctl-96h: *control*<sub>96h</sub>, Inf-24h:  
 430 *infected*<sub>24h</sub>; Res-96h: *resistant*<sub>96h</sub>, groups. Letters represent significant differences,  $P < 0.05$ ,  
 431 Tukey's HSD test.

432

433 **b) Dynamic of host transcriptomic response to infection and search for genomic**  
 434 **bases of resistance.**

435 Global mean unique mapping rate for skin smear samples reached  $71.64 \pm 2.99\%$  against a  
 436 combined reference for host and microbes compartments. Datasets were predominantly  
 437 composed of host-origin sequences (mean  $86.57 \pm 13.48\%$ ), with *infected*<sub>24h</sub> group showing  
 438 significantly higher proportion of non-host origin reads [mean  $30.70 \% \pm 0.03$  se] than other  
 439 groups (Dunn's test; Benjamini-Hochberg adj.  $P < 0.05$ ; Figure S1). Details of host'  
 440 transcriptome and individuals mapping are provided in Table S1 and S3.

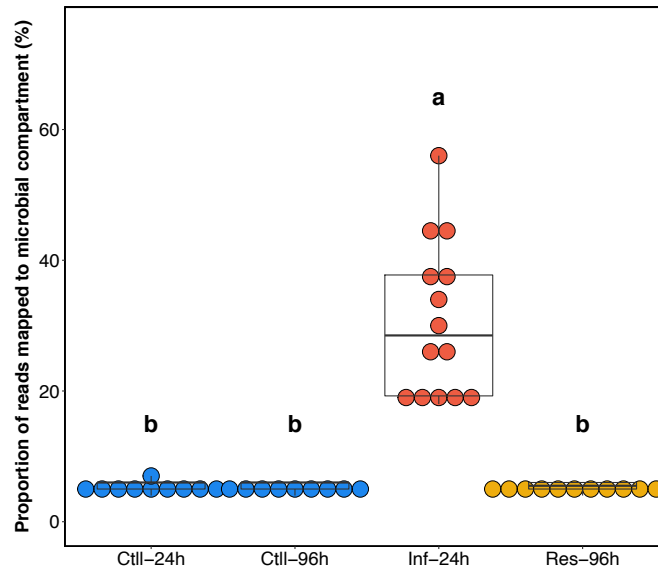

441

442 **Figure S 1: Proportion of the reads mapped to the microbial compartment.** Reads origin  
 443 was dissociated *in silico*. Reads were considered originating from microbial compartment  
 444 when no mapping was evident in the fish transcriptome. Ctl-24h: *control*<sub>24h</sub>; Ctl-96h:  
 445 *control*<sub>96h</sub>, Inf-24h: *infected*<sub>24h</sub>; Res-96h: *resistant*<sub>96h</sub>, groups. Letters represent significant  
 446 differences,  $P < 0.05$ , Dunn's test.

447 **Fish response to infection.** Differential expression analyses reveal strong differences in host  
 448 genes expression profiles between *control*<sub>24h</sub> and *infected*<sub>24h</sub>, with a total of 3,631 and 2,388  
 449 down and up-regulated genes in *infected*<sub>24h</sub>, respectively, compared to *control*<sub>24h</sub>, ( $|FC| > 2$ ;  
 450  $FDR < 0.01$ ; Table S4). *Infected*<sub>24h</sub> group responds to infection mainly by activating immune  
 451 system response (Biological Process; BP), sterol biosynthetic process (BP), defense response  
 452 (BP), inflammatory response (BP), regulation of biological quality (BP), lipid metabolic  
 453 process (BP), iron ion homeostasis (BP), complement binding (Molecular Function; MF),  
 454 heme binding (MF), oxidoreductase activity (MF), sulphur compound binding (MF), (1->3)-  
 455 beta-3-D-glucan binding (MF). A complete list of GO enrichment for each module is  
 456 provided in Table S4.

457 We further used co-expression network analysis (WGCNA) to draw clusters of co-regulated  
 458 genes associated with discrete (condition) or continuous variable (weight and cortisol) and to  
 459 identify putative hub genes. No genes module significantly correlates with fish mass  
 460 suggesting that it had no significant effect on genes expression profiles. A total of three



461 modules show negative correlation ( $P < 0.01$ ) with disease status (coded 1 for *control*<sub>24h</sub>,  
462 *control*<sub>96h</sub> and *resistant*<sub>96h</sub> groups and 2 for *infected*<sub>24h</sub>) namely module<sub>turquoise-host</sub> ( $r = -0.97$ ,  $P$   
463  $< 0.001$ ), module<sub>black-host</sub> ( $r = -0.5$ ,  $P < 0.001$ ) and module<sub>green-host</sub> ( $r = -0.49$ ,  $P < 0.001$ ; Figure  
464 3). Inversely, two modules show positive correlation with the condition namely module<sub>blue-host</sub>  
465 ( $r = 0.97$ ,  $P < 0.001$ ) and module<sub>pink-host</sub> ( $r = 0.48$ ;  $P = 0.001$ ). Almost all these modules (with  
466 the exception of module<sub>black-host</sub>) also correlate significantly with cortisol levels. The genes  
467 found up-regulated in *control*<sub>24h</sub> clustered mostly in the module<sub>turquoise-host</sub> ( $n = 3,468$ ; 95.5%),  
468 module<sub>black-host</sub> ( $n = 72$ ; 2.0%) and module<sub>green-host</sub> ( $n = 39$ ; 1.0%). Nearly all the genes found  
469 up-regulated in *infected*<sub>24h</sub> clustered in module<sub>blue-host</sub> ( $n = 2,352$ ; 98.5%). Not surprisingly,  
470 main drivers genes ('hub-genes') encompass several transcriptional activators such as for the  
471 module<sub>turquoise-host</sub> several Zinc finger proteins, Transcription factor GATA-3 (*gata-3*),  
472 Forkhead box protein O3 (*foxp3*), activators of the autophagy pathways and main drivers of  
473 naïve specific T-cells differentiation and activation [56], Runt-related transcription factor 2  
474 (*runt2*) coding genes, involved in osteoblast differentiation, a mineral depositing cells and  
475 enhancer of T-cells receptor and sialoproteins [57]. In the module<sub>blue-host</sub>, 'hub-genes' mainly  
476 report actors of the innate immune system, inflammatory response, wound healing, oxidative  
477 and adhesion activity (Figure 3B).

478

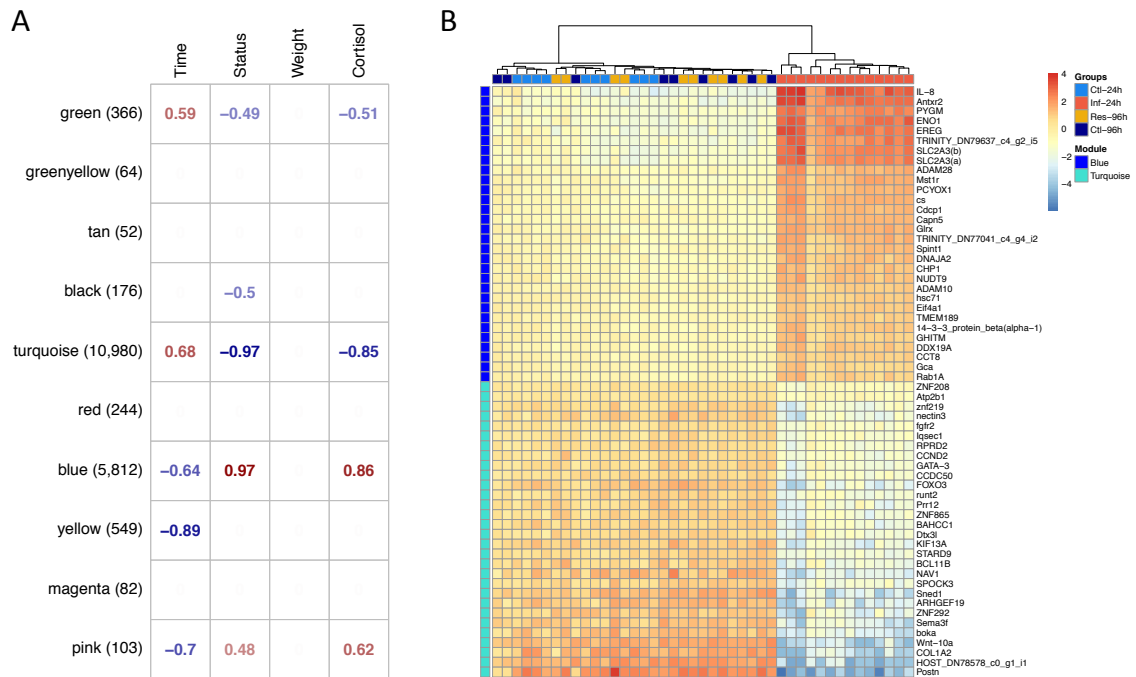

480 **Figure 3: Signed co-expression network analysis for *P. orbicularis*.** A) Correlation matrix  
 481 for *P. orbicularis*. Values in the cells represent significant ( $P < 0.01$ ) Pearson's correlation of  
 482 module eigenvalue to physiological parameters (top panel). Names (left panel) are arbitrary  
 483 color-coded names for each module; values in parenthesis represent the number of genes per  
 484 module. Empty cells indicate non-significant correlation ( $P \geq 0.01$ ). Individuals' cortisol  
 485 [ $\log(\text{pg.mg}^{-1})$ ] and weight (g) are continuous values. Time (24hpi and 96hpi) and Status  
 486 (coded 1 for *control*<sub>24h</sub>, *control*<sub>96h</sub> and *resistant*<sub>96h</sub> groups and 2 for *infected*<sub>24h</sub>) are discrete  
 487 numeric values. B) Heatmaps of top 30 genes in module<sub>blue-host</sub> and module<sub>turquoise-host</sub>. Scales  
 488 represent Log<sub>2</sub> (prior 2) of the individuals' expression levels. Individuals were clustered using  
 489 hierarchical clustering procedures implemented in pheatmap R package [58].

490

491 **Genomic bases of resistance.** We found 38 DEGs between *control*<sub>96h</sub> and *resistant*<sub>96h</sub> (16 and  
 492 22 down and up-regulated in *resistant*<sub>96h</sub>, respectively;  $|FC| > 2$ ; FDR < 0.01). GO analyses  
 493 show that adaptive immune response (BP) tends to be activated (uncorrected  $P < 0.001$ ) in  
 494 *resistant*<sub>96h</sub> that includes genes related to pathogens recognition and immune response such as  
 495 C-type lectin domain family 4 member M, Low affinity immunoglobulin gamma Fc receptor  
 496 II-like and T-cell receptor beta variable 7-2 coding genes. Inversely, *resistant*<sub>96h</sub> show  
 497 inactivation of the regulation of ERK1 and ERK2 cascade (BP) and repressors of the response  
 498 to wounding (BP), regulation of the transforming growth factor-beta secretion (BP), alcohol  
 499 biosynthetic process (BP) and regulation of interleukin-8 production (BP). However, GO

500 enrichments were not considered significant under our threshold (Bonferroni adj.  $P > 0.05$ ).  
501 A total of 27 (71.1%), out the 38 DEGs identified, also showed different expression levels  
502 between *control*<sub>24h</sub> and *infected*<sub>24h</sub>. Among the 11 remaining genes (28.9%), we found Arf-  
503 GAP with dual PH domain-containing protein 1, C-type lectin domain family 4 member M,  
504 protein KIAA1324-like homolog, Ankyrin repeat and fibronectin type-III domain-containing  
505 protein 1 and T-cell receptor beta variable 7-2, up-regulated in *resistant*<sub>96h</sub> group. Inversely,  
506 we found the Sal-like protein 1, Early growth response protein 1 and the Low affinity  
507 immunoglobulin gamma Fc receptor II-like down-regulated in *resistant*<sub>96h</sub>. The complete list  
508 of DEGs and GO term enriched is provided in Table S4.

509 We finally searched for genetic variation (SNPs) across *resistant*<sub>96h</sub> and *infected*<sub>24h</sub> (two  
510 established phenotypes) in order to identify putative variants associated with resistance  
511 capacities. We identified a subset of 13,448 filtered bi-allelic SNPs. Genetic variations  
512 analyses did not suggest any significant difference among groups (relatedness, Fst) and was  
513 not correlated with any of the groups' cortisol levels or fish mass based on the 13,448 markers  
514 (PERMANOVA; 1000 permutations;  $P = 0.18$ ; Figure S2).

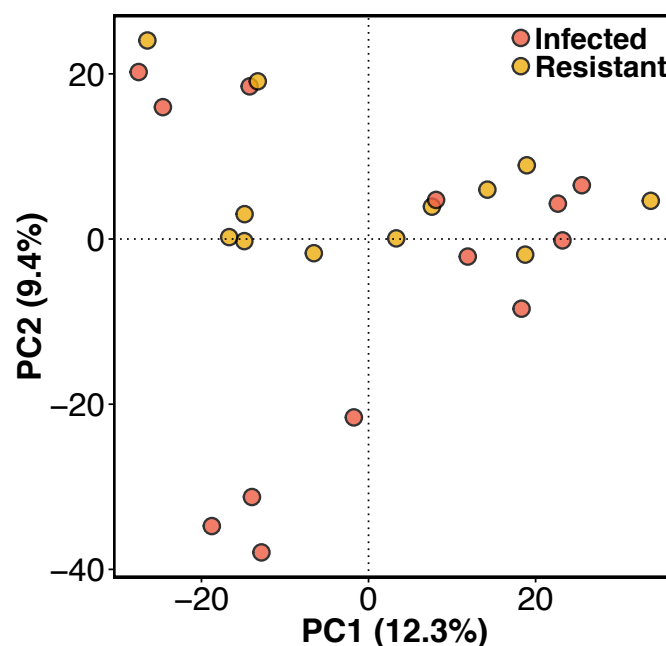

515

516 **Figure S 2: Genetic variation and relatedness across established phenotypes.** Principal  
517 component analysis for the total filtered dataset including 13,448 bi-allelic markers.

518

519 **c) Microbiome flexibility and interaction among pathogens species and host**  
520 **response**

521 **Dynamic of microbiota communities on fish skin.** MiSeq sequencing strategy with  
522 amplification of the 16S rRNA V4 region of the 16S rRNA resulted a mean number of PE of  
523  $231,164.02 \pm 36,542.99$  sd out of which a mean of  $82.47 \pm 2.54$  remained after filtering  
524 (Table S2). Species richness (Shannon) was lower in *infected<sub>24h</sub>* than other groups (MWW;  
525 Holm adj.  $P < 0.001$ ). Similarly, *control<sub>24h</sub>* shows reduced species diversity values compared  
526 to *control<sub>96h</sub>* (MWW; Holm adj.  $P < 0.001$ ) but no difference was observed between  
527 *resistant<sub>96h</sub>* and *control<sub>96h</sub>* (MWW; Holm adj.  $P = 0.71$ ; Figure S3A). Similar observation was  
528 made for Fisher's alpha parameter but the latter shows significant difference between  
529 *control<sub>24h</sub>* and *resistant<sub>96h</sub>* (MWW; Holm adj.  $P = 0.05$ ; Figure S3B). Bacterial communities  
530 vary significantly across groups (PERMANOVA;  $F = 30.93$ ;  $P < 0.001$ ); however, the beta  
531 dispersion also differs significantly ('betadisper', ANOVA,  $F = 30.93$ ;  $P < 0.001$ ).  
532 Specifically, based on Bray-Curtis distances values, communities are less variable in  
533 *infected<sub>24h</sub>* group compared to all other groups (Tukey's HSD, [*control<sub>24h</sub>-infected<sub>24h</sub>*: 95%  
534 CI= 0.05-0.19; *resistant<sub>96h</sub>-infected<sub>24h</sub>*: 95% CI= 0.17-0.31; *control<sub>96h</sub> - infected<sub>24h</sub>*: 95% CI=  
535 0.12-0.28];  $P < 0.001$ , Figure S4). Communities are also more variable in *resistant<sub>96h</sub>*  
536 compared to *control<sub>24h</sub>* (Tukey's HSD, 95% CI= 0.04-0.20;  $P = 0.001$ ). The ASVs associated  
537 with *Tenacibaculum* (*Flavobacteriales*) are largely enriched in *infected<sub>24h</sub>* compared to  
538 *control<sub>24h</sub>*, but also significantly enriched in *resistant<sub>96h</sub>* compared to *control<sub>96h</sub>* (shrunked  
539  $|\text{Log}_2\text{FC}| > 2$ ;  $\text{FDR} < 0.01$ ; Figure S4).

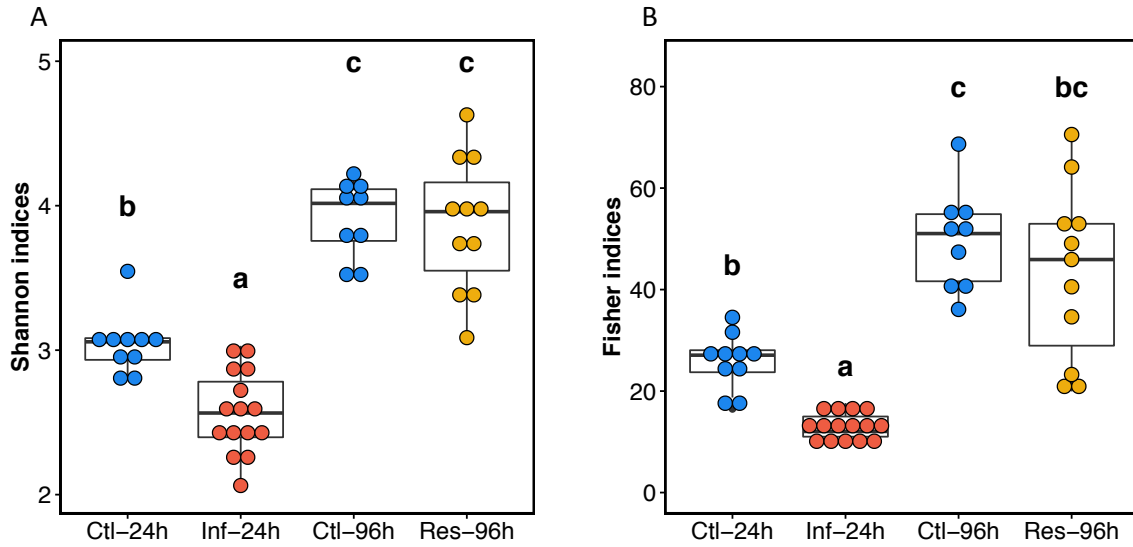

540

541 **Figure S 3: Alpha-diversity estimates across groups.** Alpha-diversity was computed using  
 542 A) Shannon ( $H'$ ) and B) Fisher indexes. Ctl-24h: *control*<sub>24h</sub>; Ctl-96h: *control*<sub>96h</sub>, Inf-24h:  
 543 *infected*<sub>24h</sub>; Res-96h: *Resistant*<sub>96h</sub>, groups. Letters represent significant differences,  $P < 0.05$ ,  
 544 Tukey's HSD. Each dot represents an individual.

545

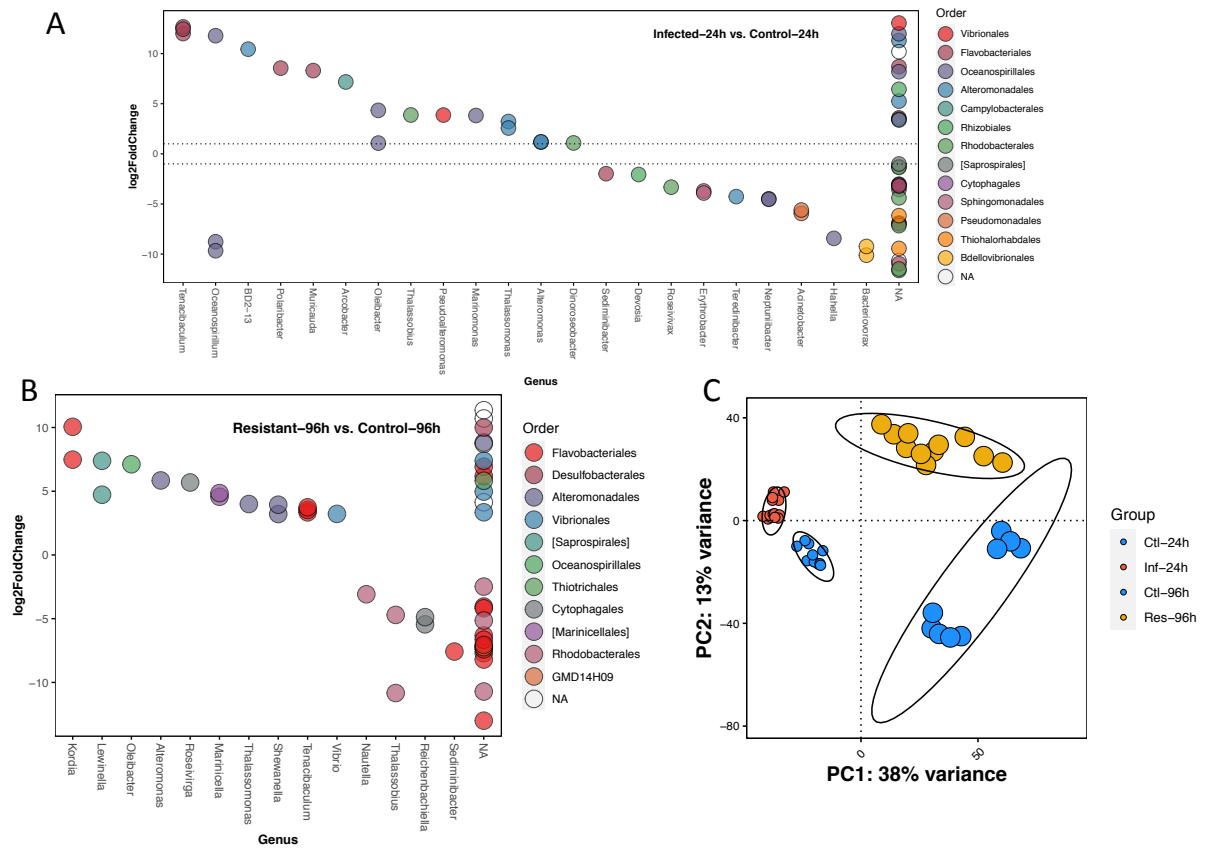

546

547 **Figure S 4: Taxa enrichment and beta-diversity dissimilarities across groups.** A) ASVs  
 548 enrichment between *infected*<sub>24h</sub> (positive log2FC) and *control*<sub>24h</sub> (negative values). Colors  
 549 represent different Orders. The y-axis reports shrunk Log2FC. Horizontal dash lines  
 550 represent Log2FC threshold for significance ( $|\text{Log2FC}| > 2$ ). NAs represent missing  
 551 taxonomic information for this ASV; B) ASVs enrichment between *resistant*<sub>96h</sub> (positive  
 552 log2FC) and *control*<sub>96h</sub> (negative values). Colors represent different orders. The x-axis  
 553 represents associated Genus, y-axis reports shrunk Log2FC. NAs represent missing  
 554 taxonomic information for this ASV. C) PCoA based on Bray-Curtis distance values. Ellipses  
 555 represent 95% CI intervals. Ctl-24h: *control*<sub>24h</sub>; Ctl-96h: *control*<sub>96h</sub>, Inf-24h: *infected*<sub>24h</sub>; Res-  
 556 96h: *Resistant*<sub>96h</sub>, groups. Smaller points code for 24hpi, larger points for 96hpi groups.

557

558 **Long-reads refinement of bacteria communities in infected fish.** Results from Nanopore  
 559 sequencing on full 16S rRNA sequences served to refine the taxonomy at the species levels,  
 560 which might be limited with short-reads approaches. We amplified the full 16S rRNA for 8  
 561 individuals randomly subsampled from the infected group 24hpi resulting in a mean number  
 562 of SE reads of  $60,019.62 \pm 33,778.99$  sd after pre-processing (individual with the lowest  
 563 coverage reached a total of 29,520 sequences). Nanopore shows an over-dominance of *T.*  
 564 *maritimum* in *infected*<sub>24</sub> ( $73.51 \pm 4.89\%$ ) and confirmed the the presence of other genera,  
 565 including *Vibrio*, *Polibacter*, *Alteromonas* and *Pseudoalteromonas* (Figure S5). Among these  
 566 genera, some species are known as potential fish pathogens such as *V. harveyi* [59], while  
 567 others (*Pseudoalteromonas*) have been proposed as putative probiotics [60].

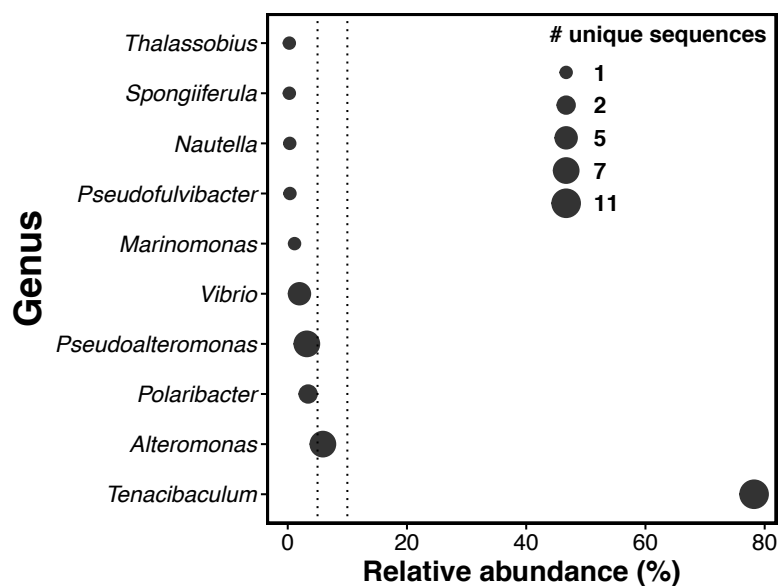

568

569 **Figure S 5: Relative abundance of bacterial genera in the *infected*<sub>24h</sub> group reported**  
570 **with Nanopore.** 16S rRNA sequences and their relative abundance were generated from  
571 Nanopore reads (see methods). These sequences were blast against NCBI nt database  
572 (BLASTn; e-value<10<sup>-5</sup>). Size of the dots represent the number of unique sequence per  
573 genus.

574

#### 575 **d) Microbial compartment transcriptomic activity**

576 **Genes expression of *Tenacibaculum maritimum* during experimental infection vs *in vitro*.**

577 We explored the genes expression levels for *T. maritimum* in the fish during the pic of  
578 infection compared to *in vitro* to highlight putative genes associated with virulence (Figure 4).

579 Mean total mapped reads against *T. maritimum in vivo* reached 5.65M ± 0.82 se (Figure S6),

580 which is sufficient to conduct differential expression analysis [61].

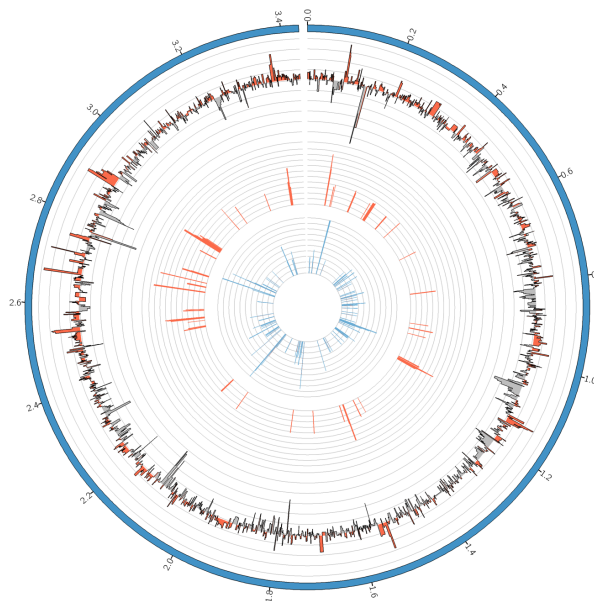

581

582 **Figure 4: Circos plot of *in vitro* and *in vivo* *T. maritimum* expression comparisons.**

583 External line represents mean shrunk log2FC *in vitro* (negative values) compared to *in vivo*  
584 (positive values). Red bars represent shrunk log2FC of significantly up-regulated genes  
585 *in vivo*; blue histograms represent shrunk log2FC of significantly up-regulated genes  
586 *in vitro*. Circos positions were based on *T. maritimum* NCIMB 2154<sup>T</sup> genome information. Positions  
587 represented by external ticks are reported in million bp.

588

589

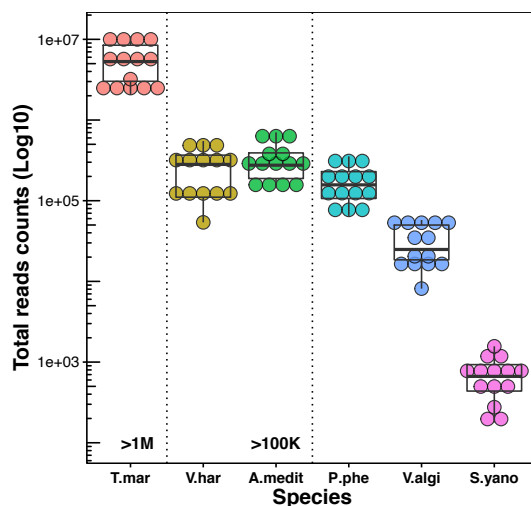

590

591 **Figure S 6: Total Illumina PE reads count for the most abundant species in the**  
 592 **microbial compartment.** The selected reference species were the most abundant species  
 593 represented in the Nanopore 16S rRNA analysis (see methods). T.mar: *T. maritimum*; V.har:  
 594 *Vibrio harveyi*; A.medit: *Alteromonas mediterranea*; P.phe: *Pseudoalteromonas phenolytica*;  
 595 V.algi: *Vibrio alginolyticus*; and S.yano: *Sphingobium yanoikuyae*. Each dot per species  
 596 represents one individual.

597

598 We found a total of 72 and 142 DEGs up-regulated during experimental infection (*in vivo*)  
 599 and *in vitro*, respectively (Shrunked  $|\log_2FC| > 2$ ; FDR < 0.01). We only found the sulfate  
 600 assimilation (BP) function enriched *in vitro* (Bonferroni adj.  $P < 0.1$ ). Among the GO  
 601 positively enriched during experimental infection (Bonferroni adj.  $P < 0.1$ ) we found the  
 602 glucan catabolic process (BP), external encapsulating structure part (cellular component, CC),  
 603 pattern binding (MF) and the antibiotic catabolic process (BP). These processes include genes  
 604 already highlighted in genome scale comparisons of *Tenacibaculum* species as possible  
 605 virulence-related factors such as the catalase/peroxidase *katG* or several Ton-B receptor  
 606 dependent and Suc-C and SucD-like proteins [19] (Figure S7). In parallel, we also detected  
 607 putative candidate involved in host membrane interaction and integrity such as Ulilysin,  
 608 Streptopain, Pneumolysin toxin and peptidoglycan-associated factor lipoprotein or adhesines.  
 609 A complete list of GO is provided in Table S4.

610



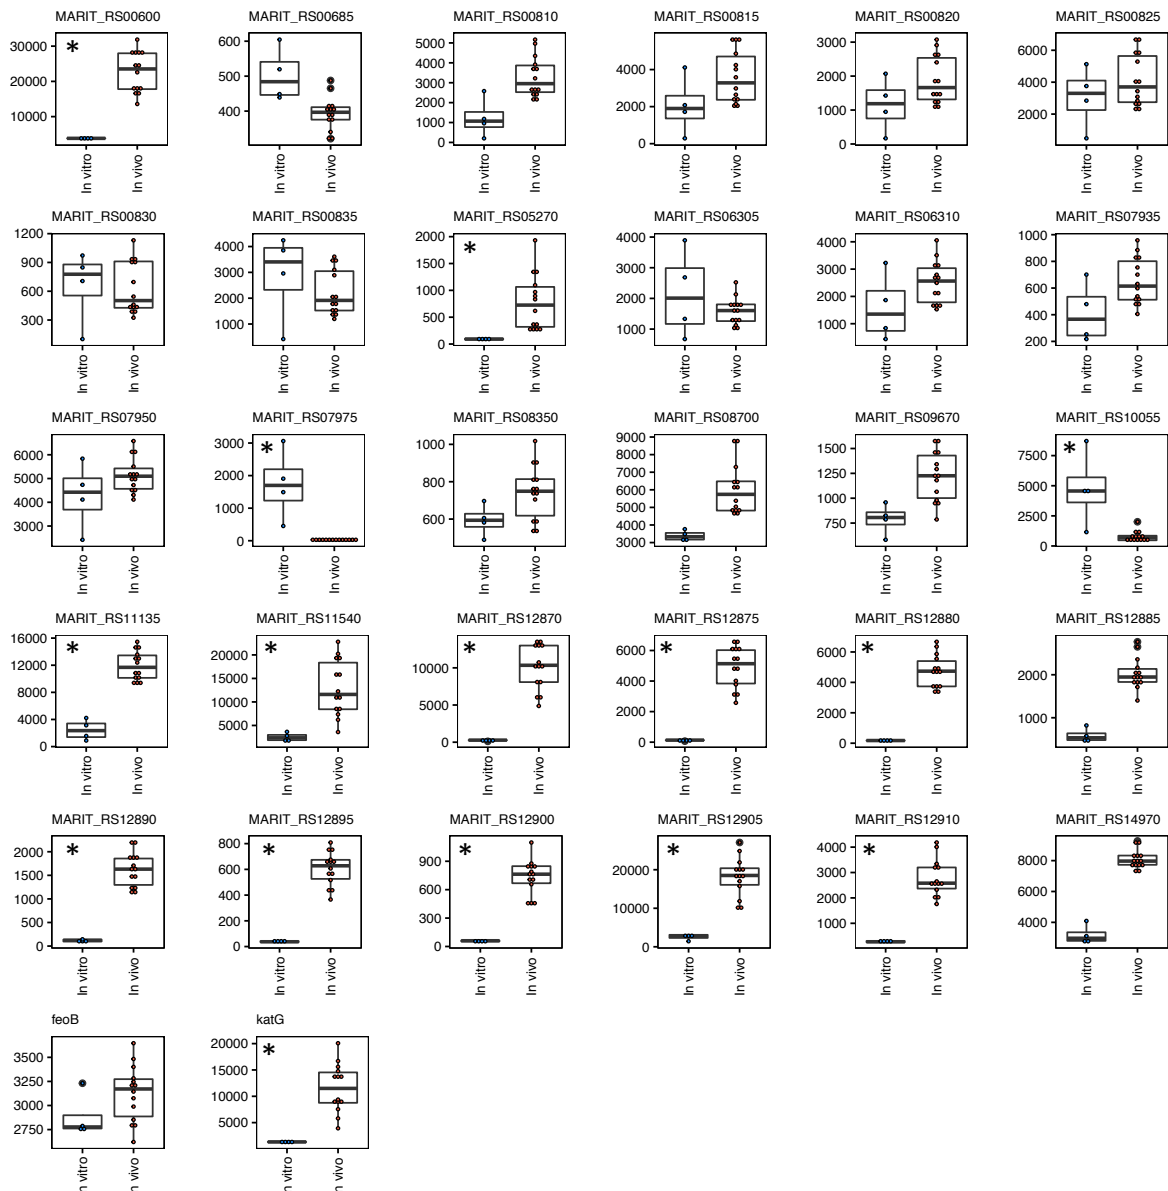

611

612 **Figure S 7: Plot of expression levels between *in vitro* and *in vivo* groups for all the**  
 613 **virulence-related genes previously identified.** The gene list was obtained from whole-  
 614 genome analysis in *Tenacibaculum* spp. [19]. Asterisks represent genes with significant  
 615 difference between groups (Shrunked  $|\text{Log2FC}| > 2$ ; FDR < 0.01).

616

617 **Discussion**

618 Tenacibaculosis is a worldwide fish disease responsible for considerable farmed fish mortality  
 619 events; yet, knowledge is still missing on the microbiome kinetics during infection and the  
 620 concomitant host-pathogens interaction. Dual RNAseq arose as a method of choice by

621 providing unprecedented simultaneous information on the molecular features of the infection.  
622 It is particularly adapted for systems characterized by a massive pathogens burden with  
623 readily accessible material and for which cultures are not available [17,62]. Here we adapted  
624 this approach for tenacibaculosis in *P. orbicularis* fish skin samples with the goal to  
625 comprehensively assess genomic basis and kinetics of the infection as well as associated  
626 resistance mechanisms.

627 **Infection modulates a wide range of host' innate and adaptive immune effectors.** Bath  
628 exposition of *T. maritimum* was highly efficient in inducing tenacibaculosis in juvenile  
629 orbicular batfish. The low survival rate and the kinetics of infection support what is usually  
630 observed for other fish species [16,20,63]. Infected fish, sampled at the pic of infection  
631 (24hpi), show large skin lesions characteristic of tenacibaculosis together with high cortisol  
632 concentration in their scales [32]. Cortisol mediates changes in individual energy balance (e.g.  
633 mobilisation of energy stores; immunity; cognition; visual acuity; and behaviour) [64,65].  
634 This initial cascade of physiological and behavioural changes enable the organism to cope  
635 with acute stressors by mobilising adequate bodily functions, while concurrently inhibiting  
636 non-essential functions (e.g. reproduction, digestion) [66]. Here increasing cortisol levels  
637 reflect local stress response to unfavourable environment and is most likely involved in  
638 triggering fish rapid immune response [67].

639 As expected fish immune response, especially innate immune system is strongly solicited at  
640 24hpi. Infected fish show activation of the acute inflammatory response, mainly through  
641 drivers genes including interleukin-8 (IL-8) [68], but also activation of pathogens recognition  
642 receptors (PRRs), chemokines as well as antimicrobial related humoral effectors. For  
643 instance, infection triggers co-expression of the cascade Toll-like receptor 5 (TLR5) and  
644 Myeloid differentiation primary response protein (MyD88), as previously reported in bony  
645 fish during bacterial infection [69]. However, the diversity of the fish immune actors along  
646 with a relatively limited knowledge on specific effectors functions significantly hampered the

647 comprehensive understanding of the mechanisms involved in our non-model species. For  
648 instance, in parallel of the TLR5, several other TLRs show reduced expression in infected  
649 fish, including TLR2 type-1, TLR-8 and non-mammalian ('fish-specific') TLR21. Despite  
650 previous effort toward assessing diversity of TLRs sequences, protein-specific function  
651 remains poorly known in teleost [70]. Similar observations can be made for the Complement  
652 system, specifically complement C3, a key component of the immune system involves in  
653 "complementing" antibodies for bacteria cells killing [71], for which several isoforms are  
654 reported in the platax transcriptome. The different isoforms here have divergent patterns of  
655 expression (both up or down-regulated in *infected<sub>24h</sub>* group), which support previously  
656 observed difference in target surface binding specificities [72].

657 Innate immune response is generally tightly linked with cellular homeostasis regulation and  
658 precedes adaptive immune response. The ability of the fish to maintain cellular homeostasis  
659 during infection is of primary importance when facing infection and mechanisms include  
660 redox, biological quality control (autophagy) as well as ion levels maintenance [73,74]; all  
661 found affected in the platax. For instance, infected fish largely activates effectors of the iron  
662 ion homeostasis. Iron, albeit largely present in the environment, is poorly accessible by  
663 organisms and iron sequestration and maintenance is a major mechanisms developed by the  
664 host to limit pathogens growth as well as to regulate macrophages cytokines production [75].  
665 In parallel, *infected<sub>24</sub>* activate the (1->3)-beta-D-glucan binding process and contribute to the  
666 body of literature revealing receptor capacities in fish and pathways conservation (through  
667 PRRs, C-lectin and/or TLRs) across vertebrates and invertebrates [76,77]. Indeed,  
668 supplementation of  $\beta$ -glucan stimulates immune response in fish and confers higher resistance  
669 of the host to virus and pathogens (probably by reducing bacteria adhesion through lectin  
670 binding [78]); hence representing promising immunostimulant in aquaculture [77,79]. Effect  
671 of  $\beta$ -glucan vary depending on the species, exposure time, source of glucan, organs and  
672 markers monitored [76,80] and further studies will be needed to evaluate its potential at the

673 production scale. Nevertheless,  $\beta$ -glucan is also relevant in bridging inflammatory response  
674 and activation / differentiation of T-cells in the adaptive immune response [81].

675 The adaptive immune response was also modulated at 24hpi and its fine-tuned orchestration  
676 offers the opportunity to dissect preferential immune paths to fight against *T. maritimum*  
677 infection. We identified several hallmarks of differentiated T-cells, indicative of the  
678 specialisation of the adaptive immune response to *T. maritimum* infection. Among the main  
679 driver genes of the response to infection in platex we noted a reduced expression of *foxp3* and  
680 *gata-3* in *infected*<sub>24h</sub>. Both transcription factors are important regulators of Naïve CD4<sup>+</sup> naïve  
681 T-cells fate encouraging differentiation to T-regulatory (Treg) [82] and T-helper 2 (Th2) cells  
682 [56], respectively. Similarly, we show reduced expression of T-bet transcription factors, an  
683 hallmark of Th1 cells [56]. Inversely, infected fish seem to activate Th17 cells differentiation  
684 as suggested by simultaneous activation of signal transducer and activator of transcription  
685 (STAT1- $\alpha$ / $\beta$ ) and cytokine IL-17 [82]. The Th17 cells are mainly dedicated to control  
686 bacterial and fungi entry [83]. Our results suggest and support previous a complex  
687 orchestration of T-cells differentiation via antigens communication and associated cytokines  
688 regulatory network in platex during *T. maritimum* infection [56,84]. However, we can't over  
689 rule that changes in transcripts abundance might also be indicative of cells migration and  
690 certainly, other approaches including cellular imaging [85] would clarify the presence and  
691 refine the regulation of T-reg cells in fish.

692 **The genomic bases of resistance in *P. orbicularis*.** Despite profound activation of the  
693 immune system response, most of the fish failed at containing the infection. At 96hpi, less  
694 than 25% of the infected fish had survived the bacterial challenge. These surviving  
695 individuals did not display any skin lesion, suggesting they resisted the *T. maritimum*  
696 penetration and/or limited initial bacterial adhesion. Considering the high bacterial  
697 concentration in the tanks during infection and the severity of the mortality event, it is very  
698 unlikely that resistant fish might have totally escaped contact with the pathogen. Indeed, *T.*

699 *maritimum* were present in *resistant*<sub>96h</sub> but not in *control*<sub>96h</sub> (see next section for details). Fish  
700 were thus able to maintain the integrity of first barrier against pathogens; hence we  
701 hypothesize that genes activity difference would reveal specific immune actors present and/or  
702 efficient enough (timing of regulation) to inhibit pathogens multiplication and entry in  
703 resistant fish [16]. We show that PRRs, specifically a C-type lectin receptor, was up-regulated  
704 in *resistant*<sub>96h</sub>, together with a T-cell receptor and Low affinity immunoglobulin gamma Fc  
705 receptor II-like while fibronectin coding genes was down-regulated. These genes-products are  
706 known for binding, agglutinating and neutralizing bacteria [86] as well as triggering humoral  
707 immune response [87] or providing extracellular structure for pathogens adhesion through  
708 fibronectin-binding proteins [88,89]. Our experimental design did not allow segregating  
709 between a basal difference in expression in *resistant*<sub>96h</sub> (genomic basis of resistance *per se*) or  
710 if the difference at 96hpi is the result of a delayed adaptive immune response (timing of genes  
711 expression). Nonetheless, in catfish, lectin expression allows differentiating resistant from  
712 susceptible families against *Flavobacterium columnare*, another gram-negative bacteria of  
713 the *Flavobacteriaceae* family [90]. Further longitudinal studies monitoring genes expression  
714 of resistant fish along the entire infection (and before the challenge) should prove useful in  
715 identifying resistant-specific response to infection. Ideally, these studies should also  
716 simultaneously look at different immune-specific organs and tissues compartments and  
717 integrate genome-scale genetic variants (not limited to coding regions) to infer putative  
718 genetic bases of resistance.

719 **Microbiome dynamics and host-pathogens communication.** At 24hpi, microbiome  
720 community was dramatically affected with over-dominance of *T. maritimum*. Abundance of  
721 *T. maritimum* was evident from metabarcoding data and contributes to significantly reduce  
722 species richness in *infected*<sub>24h</sub> fish. We went further and compared expression of *T.*  
723 *maritimum in vivo* (during infection) compared to *in vitro*, with the hypothesis that key  
724 drivers of pathogenicity would be solicited for thriving and breaking host' defense barriers.

725 There are at least two major challenges that *T. maritimum* needs to overcome to successfully  
726 infect the host: Pathogens need 1) to compete (at the intra and interspecific levels) for  
727 resources to metabolise from the local environment and 2) to resist to the host immune  
728 responses and stressful conditions. During infection *T. maritimum* enhances its glucan  
729 catabolic activity; while this might only reflect differences due to changes of the local  
730 environment conditions (host mucus and skin) and/or resources availability, it also reveals  
731 some major mechanisms explaining the success of *T. maritimum* to grow on fish skin. Among  
732 the genes involved in glucan catabolic, we report several key components linking alternative  
733 food and minerals supplies and putative virulence-related functions, such as several genes  
734 involve in specifically degrading and up taking sialoglycan and ions, mainly iron [19].  
735 Sialidase activity explains *Capnocytophaga canimorsus* burst when in contact with host cells  
736 it allows the pathogen to mobilise sugar directly from host phagocytes [91]. Similarly, the  
737 tonB coding gene, regularly reported as a gene relevant for pathogenicity, confers virulence to  
738 *Edwardsiella ictaluri* by allowing to maintain growth in iron-depleted medium [92]. In  
739 parallel, several stress resistance related genes were activated during experimental infection;  
740 all also involved in the antibiotic catalytic functions. These genes include *kataA* and *katG*,  
741 coding for two catalases-peroxidases involved in resistance to reactive oxygen species (ROS),  
742 by detoxifying exogenous H<sub>2</sub>O<sub>2</sub> produced by host macrophages as a defense mechanism [93].  
743 Obviously, the identification of virulence-related genes can not be limited to the ones  
744 differentiating *in vitro* versus *in vivo* infectious status and other actors might be involved in  
745 conferring *T. maritimum* its pathogenicity. For instance, siderophore coding genes are  
746 constitutively expressed *in vitro* or during experimental infection. These genes are a  
747 determining factor of host-pathogens and pathogens-pathogens interactions in the so-called  
748 “race for iron” [94–96], which suggest that *T. maritimum* is highly efficient in mobilizing  
749 iron, independently of the local environment.

750 Finally, we mostly explored here expression levels variation in the light of an exclusive  
751 interplay between host and *T. maritimum*, which might be effective considering the over-  
752 dominance of *T. maritimum* in fish mucus. However, most of the infection systems report  
753 several pathogen co-occurrences and the presence and/or activity of other opportunistic  
754 pathogens might also play an important role in host' fate [15]. In infected fish, we found a  
755 relatively large representation of those so-called “opportunistic” bacteria, known for their  
756 pathogenicity in fish, including *V. harveyi*. *V. harveyi* is an ubiquitous bacteria and one of the  
757 most common pathogens inducing major disease outbreaks in fish farming [59]. The  
758 enrichment for Vibrio ASVs in *resistant<sub>96h</sub>* mucosal communities and the absence of evident  
759 physiological associated changes (cortisol, mortality, skin integrity) in this group, suggest that  
760 *V. harveyi* alone is not sufficient to induce mortality in platex under our specific experimental  
761 conditions and associated bacterial burden.

## 762 **Conclusions**

763 Here we provide a comprehensive description of the host and *T. maritimum* interplay under  
764 experimental infection conditions. Our results serve in deciphering the complex orchestration  
765 of innate and immune response of the host but also propose some promising avenues of  
766 research to limit the impact of tenacibaculosis in fish farming. By deploying an integrative  
767 ‘omic’ approach, we identified bacterial interaction as well as putative virulence-related genes  
768 in *T. maritimum* and candidate-genes involved in fish resistance. Importantly however, the  
769 detection of immune actors in fish and our comprehension of their regulation rely mainly on  
770 the quality of the annotation and the knowledge we have of their activity in other species,  
771 mainly mammals model species. Consequently, further studies are now urgently needed to  
772 properly apprehend genetic and genomic bases of response to infection and possible  
773 resistance capacities in other non-model fish species.

774 **Ethics approval.** *In vivo* experiments compiles with all the sections of deliberation n° 2001-  
775 16 APF from the Assembly of French Polynesia regarding domestic or wild animals welfare,  
776 issued in ‘Journal Officiel de Polynésie française’ on February 1<sup>st</sup>, 2001. In the absence of  
777 *ad hoc* ethical Committees, we follow European Commission, DGXI [97] and ARRIVE [98]  
778 guidelines.

779 **Consent for publication.** Not applicable

780 **Data accessibility.** Raw sequences are deposited in NCBI database under accession number  
781 (PRJNA656561). Codes are made publicly available on a Github repository:  
782 [https://github.com/jleluyer/metatranscriptomics\\_workflow](https://github.com/jleluyer/metatranscriptomics_workflow)

783 **Authors’ contributions.** DS and JLL conceived the experiment. MC conducted fish  
784 husbandry and rearing. DS, MC, JLL and QS conducted the sampling. CB and CB conducted  
785 DNA and RNA extractions. QS conducted the cortisol levels analyses. PA assembled the *P.*  
786 *orbicularis* transcriptome. JLL conducted the RNAseq and MiSeq analyses. JP conducted the  
787 Nanopore sequencing. JLL and QC conducted the Nanopore analyses. All co-authors made  
788 substantial revisions to the manuscript.

789 **Competing interest.** The authors declare no competing interest

790 **Funding.** The study was conducted under the Capamax project (Politique de site Ifremer)  
791 attributed to DS and JLL with financial support from Aqua-Sana convention [Ifremer-  
792 Direction des Ressources Marines (DRM)] for fish rearing and maintenance attributed to DS.

793 **Acknowledgement.** We thank the Direction des Ressources Marines and Chedia Hamouna  
794 for their help with fish rearing. We thank Céline Reisser for providing additional gonads  
795 tissues for the platax transcriptome assembly. We also thank Eric Duchaud and Pierre  
796 Boudinot for providing valuable comments on the manuscript.

797 **References**



- 798 1. Daszak P. Emerging Infectious Diseases of Wildlife-- Threats to Biodiversity and Human  
799 Health. *Science*. 2000;287:443–9.
- 800 2. Celis JE, Kruhøffer M, Gromova I, Frederiksen C, Østergaard M, Thykjaer T, et al. Gene  
801 expression profiling: monitoring transcription and translation products using DNA  
802 microarrays and proteomics. *FEBS Letters*. 2000;480:2–16.
- 803 3. Kellam P. Post-genomic virology: the impact of bioinformatics, microarrays and  
804 proteomics on investigating host and pathogen interactions. *Reviews in Medical Virology*.  
805 2001;11:313–29.
- 806 4. Kato-Maeda M, Gao Q, Small PM. Microarray analysis of pathogens and their interaction  
807 with hosts. *Cellular Microbiology*. 2001;7.
- 808 5. Casadevall A, Pirofski L. Host-Pathogen Interactions: Redefining the Basic Concepts of  
809 Virulence and Pathogenicity. Fischetti VA, editor. *Infect Immun*. 1999;67:3703–13.
- 810 6. Westermann AJ, Gorski SA, Vogel J. Dual RNA-seq of pathogen and host. *Nature Reviews*  
811 *Microbiology*. 2012;10:618–30.
- 812 7. Westermann AJ, Barquist L, Vogel J. Resolving host–pathogen interactions by dual RNA-  
813 seq. *PLOS Pathogens*. 2017;13:e1006033.
- 814 8. Rubio T, Oyanedel D, Labreuche Y, Toulza E, Luo X, Bruto M, et al. Species-specific  
815 mechanisms of cytotoxicity toward immune cells determine the successful outcome of *Vibrio*  
816 infections. *Proc Natl Acad Sci USA*. 2019;116:14238–47.
- 817 9. Huang L, Zhao L, Liu W, Xu X, Su Y, Qin Y, et al. Dual RNA-Seq Unveils *Pseudomonas*  
818 *plecoglossicida* htpG Gene Functions During Host-Pathogen Interactions With *Epinephelus*  
819 *coioides*. *Front Immunol*. 2019;10:984.
- 820 10. Zhang B, Zhuang Z, Wang X, Huang H, Fu Q, Yan Q. Dual RNA-Seq reveals the role of

821 a transcriptional regulator gene in pathogen-host interactions between *Pseudomonas*  
822 *plecoglossicida* and *Epinephelus coioides*. *Fish & Shellfish Immunology*. 2019;87:778–87.

823 11. Valenzuela-Miranda D, Gallardo-Escárate C. Dual RNA-Seq Uncovers Metabolic Amino  
824 Acids Dependency of the Intracellular Bacterium *Piscirickettsia salmonis* Infecting Atlantic  
825 Salmon. *Front Microbiol*. 2018;9:2877.

826 12. Susi H, Barrès B, Vale PF, Laine A-L. Co-infection alters population dynamics of  
827 infectious disease. *Nat Commun*. 2015;6:5975.

828 13. Louhi K-R, Sundberg L-R, Jokela J, Karvonen A. Interactions among bacterial strains and  
829 fluke genotypes shape virulence of co-infection. *Proc R Soc B*. 2015;282:20152097.

830 14. Kinnula H, Mappes J, Sundberg L-R. Coinfection outcome in an opportunistic pathogen  
831 depends on the inter-strain interactions. *BMC Evol Biol*. 2017;17:77.

832 15. Kotob MH, Menanteau-Ledouble S, Kumar G, Abdelzaher M, El-Matbouli M. The  
833 impact of co-infections on fish: a review. *Veterinary Research*. 2016;47:98.

834 16. Avendaño-Herrera R, Toranzo A, Magariños B. Tenacibaculosis infection in marine fish  
835 caused by *Tenacibaculum maritimum*: a review. *Diseases of Aquatic Organisms*.  
836 2006;71:255–66.

837 17. Rosani U, Varotto L, Domeneghetti S, Arcangeli G, Pallavicini A, Venier P. Dual analysis  
838 of host and pathogen transcriptomes in ostreid herpesvirus 1-positive *Crassostrea gigas*.  
839 *Environ Microbiol*. 2015;17:4200–12.

840 18. Reverter M, Saulnier D, David R, Bardon-Albaret A, Belliard C, Tapissier-Bontemps N,  
841 et al. Effects of local Polynesian plants and algae on growth and expression of two immune-  
842 related genes in orbicular batfish (*Platax orbicularis*). *Fish & Shellfish Immunology*.  
843 2016;58:82–8.

- 844 19. Pérez-Pascual D, Lunazzi A, Magdelenat G, Rouy Z, Roulet A, Lopez-Roques C, et al.  
845 The Complete Genome Sequence of the Fish Pathogen *Tenacibaculum maritimum* Provides  
846 Insights into Virulence Mechanisms. *Frontiers in Microbiology*. 2017;8.
- 847 20. Rahman T, Suga K, Kanai K, Sugihara Y. Infection Kinetics of *Tenacibaculum*  
848 *maritimum* on the Abraded Skin of Japanese Flounder *Paralichthys olivaceus*. *Fish*  
849 *Pathology*. 2015;50:44–52.
- 850 21. Salinas I, Magadán S. Omics in fish mucosal immunity. *Developmental & Comparative*  
851 *Immunology*. 2017;75:99–108.
- 852 22. Parra D, Reyes-Lopez FE, Tort L. Mucosal Immunity and B Cells in Teleosts: Effect of  
853 Vaccination and Stress. *Front Immunol*. 2015;6.
- 854 23. Pérez T, Balcázar JL, Ruiz-Zarzuela I, Halaihel N, Vendrell D, de Blas I, et al. Host–  
855 microbiota interactions within the fish intestinal ecosystem. *Mucosal Immunology*.  
856 2010;3:355.
- 857 24. Xu W, Yang L, Lee P, Huang WC, Nossa C, Ma Y, et al. Mini-review: perspective of the  
858 microbiome in the pathogenesis of urothelial carcinoma. *Am J Clin Exp Urol*. 2014;2:57–61.
- 859 25. Cadwell K. The virome in host health and disease. *Immunity*. 2015;42:805–13.
- 860 26. Cho I, Blaser MJ. The Human Microbiome: at the interface of health and disease. *Nat Rev*  
861 *Genet*. 2012;13:260–70.
- 862 27. Llewellyn MS, Leadbeater S, Garcia C, Sylvain F-E, Custodio M, Ang KP, et al.  
863 Parasitism perturbs the mucosal microbiome of Atlantic Salmon. *Scientific Reports*.  
864 2017;7:srep43465.
- 865 28. Rawls JF, Samuel BS, Gordon JI. Gnotobiotic zebrafish reveal evolutionarily conserved  
866 responses to the gut microbiota. :6.

- 867 29. Kelly C, Salinas I. Under Pressure: Interactions between Commensal Microbiota and the  
868 Teleost Immune System. *Front Immunol.* 2017;8.
- 869 30. Bridel S, Bourgeon F, Marie A, Saulnier D, Pasek S, Nicolas P, et al. Genetic diversity  
870 and population structure of *Tenacibaculum maritimum*, a serious bacterial pathogen of marine  
871 fish: from genome comparisons to high throughput MALDI-TOF typing. 2020 [cited 2020  
872 Aug 10]; Available from: <https://pubag.nal.usda.gov/catalog/6938600>
- 873 31. Therneau TM, Grambsch PM. *Modeling Survival Data: Extending the Cox Model.*  
874 Springer. New York; 2000.
- 875 32. Sadoul B, Geffroy B. Measuring cortisol, the major stress hormone in fishes. *Journal of*  
876 *Fish Biology.* 2019;
- 877 33. Carbajal A, Monclús L, Tallo-Parra O, Sabes-Alsina M, Vinyoles D, Lopez-Bejar M.  
878 Cortisol detection in fish scales by enzyme immunoassay: Biochemical and methodological  
879 validation. *Journal of Applied Ichthyology.* 2018;34:967–70.
- 880 34. Walters W, Hyde ER, Berg-Lyons D, Ackermann G, Humphrey G, Parada A, et al.  
881 Improved Bacterial 16S rRNA Gene (V4 and V4-5) and Fungal Internal Transcribed Spacer  
882 Marker Gene Primers for Microbial Community Surveys. Bik H, editor. *mSystems.*  
883 2016;1:e00009-15, /msys/1/1/e00009-15.atom.
- 884 35. Bolger AM, Lohse M, Usadel B. Trimmomatic: a flexible trimmer for Illumina sequence  
885 data. *Bioinformatics.* 2014;30:2114–20.
- 886 36. Callahan BJ, McMurdie PJ, Rosen MJ, Han AW, Johnson AJA, Holmes SP. DADA2:  
887 High resolution sample inference from Illumina amplicon data. *Nat Methods.* 2016;13:581–3.
- 888 37. DeSantis TZ, Hugenholtz P, Larsen N, Rojas M, Brodie EL, Keller K, et al. Greengenes, a  
889 Chimera-Checked 16S rRNA Gene Database and Workbench Compatible with ARB. *Applied*

- 890 and Environmental Microbiology. 2006;72:5069–72.
- 891 38. McMurdie PJ, Holmes S. phyloseq: An R Package for Reproducible Interactive Analysis  
892 and Graphics of Microbiome Census Data. Watson M, editor. PLoS ONE. 2013;8:e61217.
- 893 39. Oksanen J, Blanchet FG, Kindt R, Legendre P, Minchin PR, Wagner RBO, et al. Vegan:  
894 community ecology package. R package. Version 2.0-3; 2012.
- 895 40. Love MI, Huber W, Anders S. Moderated estimation of fold change and dispersion for  
896 RNA-seq data with DESeq2. Genome Biology. 2014;15:550.
- 897 41. Zhu A, Ibrahim JG, Love MI. Heavy-tailed prior distributions for sequence count data:  
898 removing the noise and preserving large differences. Stegle O, editor. Bioinformatics.  
899 2019;35:2084–92.
- 900 42. Li H. Minimap and miniasm: fast mapping and de novo assembly for noisy long  
901 sequences. Bioinformatics. Oxford Academic; 2016;32:2103–10.
- 902 43. Bolger AM, Lohse M, Usadel B. Trimmomatic: a flexible trimmer for Illumina sequence  
903 data. Bioinformatics. 2014;btu170.
- 904 44. Wu TD, Reeder J, Lawrence M, Becker G, Brauer MJ. GMAP and GSNAP for genomic  
905 sequence alignment: enhancements to speed, accuracy, and functionality. Statistical  
906 Genomics: Methods and Protocols. New York, NY; 2016;283–334.
- 907 45. Li H, Handsaker B, Wysoker A, Fennell T, Ruan J, Homer N, et al. The Sequence  
908 Alignment/Map format and SAMtools. Bioinformatics. 2009;25:2078–9.
- 909 46. Anders S, Pyl PT, Huber W. HTSeq—a Python framework to work with high-throughput  
910 sequencing data. Bioinformatics. 2015;31:166–9.
- 911 47. Varet H, Brillet-Guéguen L, Coppée J-Y, Dillies M-A. SARTools: A DESeq2- and  
912 EdgeR-Based R Pipeline for Comprehensive Differential Analysis of RNA-Seq Data. PLOS

913 ONE. 2016;11:e0157022.

914 48. Paradis E, Claude J, Strimmer K. APE: Analyses of Phylogenetics and Evolution in R  
915 language. *Bioinformatics*. 2004;20:289–90.

916 49. Legendre P, Anderson MJ. Distance-Based Redundancy Analysis: Testing Multispecies  
917 Responses in Multifactorial Ecological Experiments. *Ecological Monographs*. 1999;69:1.

918 50. Legendre P, Legendre L. *Numerical Ecology*, Volume 24 - 3rd Edition. Elsevier; 2012.

919 51. Klopfenstein DV, Zhang L, Pedersen BS, Ramírez F, Warwick Vesztrocy A, Naldi A, et  
920 al. GOATOOLS: A Python library for Gene Ontology analyses. *Scientific Reports*.  
921 2018;8:10872.

922 52. Langfelder P, Horvath S. WGCNA: an R package for weighted correlation network  
923 analysis. *BMC Bioinformatics*. 2008;9:559.

924 53. McKenna A, Hanna M, Banks E, Sivachenko A, Cibulskis K, Kernytzky A, et al. The  
925 Genome Analysis Toolkit: A MapReduce framework for analyzing next-generation DNA  
926 sequencing data. *Genome Research*. 2010;20:1297–303.

927 54. Auwera GAV der, Carneiro MO, Hartl C, Poplin R, Angel G del, Levy-Moonshine A, et  
928 al. From FastQ data to high-confidence variant calls: the genome analysis toolkit best  
929 practices pipeline. *Current Protocols in Bioinformatics*. 2013;43:11.10.1-11.10.33.

930 55. Danecek P, Auton A, Abecasis G, Albers CA, Banks E, DePristo MA, et al. The variant  
931 call format and VCFtools. *Bioinformatics*. 2011;27:2156–8.

932 56. Mitra S, Alnabulsi A, Secombes CJ, Bird S. Identification and characterization of the  
933 transcription factors involved in T-cell development, t-bet, stat6 and foxp3, within the  
934 zebrafish, *Danio rerio*. *FEBS Journal*. 2010;277:128–47.

- 935 57. Le Luyer J, Deschamps M-H, Proulx E, Poirier Stewart N, Droit A, Sire J-Y, et al. RNA-  
936 Seq transcriptome analysis of pronounced biconcave vertebrae : a common abnormality in  
937 rainbow Trout (*Oncorhynchus mykiss*, Walbaum) fed a low-phosphorus diet. *Journal of Next*  
938 *Generation Sequencing and Applications*. 2015;2:1–13.
- 939 58. Kolde R, Kolde MR. Package ‘pheatmap.’ R Package. 2015;1.
- 940 59. Ina-Salwany MY, Al-saari N, Mohamad A, Mursidi F-A, Mohd-Aris A, Amal MNA, et  
941 al. Vibriosis in Fish: A Review on Disease Development and Prevention. *Journal of Aquatic*  
942 *Animal Health*. 2019;31:3–22.
- 943 60. Offret C, Desriac F, Le Chevalier P, Mounier J, Jégou C, Fleury Y. Spotlight on  
944 Antimicrobial Metabolites from the Marine Bacteria *Pseudoalteromonas*: Chemodiversity  
945 and Ecological Significance. *Marine Drugs*. 2016;14:129.
- 946 61. Haas BJ, Chin M, Nusbaum C, Birren BW, Livny J. How deep is deep enough for RNA-  
947 Seq profiling of bacterial transcriptomes? *BMC Genomics*. 2012;13:734.
- 948 62. Montoya DJ, Andrade P, Silva BJA, Teles RMB, Ma F, Bryson B, et al. Dual RNA-Seq  
949 of Human Leprosy Lesions Identifies Bacterial Determinants Linked to Host Immune  
950 Response. *Cell Reports*. 2019;26:3574-3585.e3.
- 951 63. Avendaño-Herrera R, Toranzo AE, Magariños B. A challenge model for *Tenacibaculum*  
952 *maritimum* infection in turbot, *Scophthalmus maximus* (L.). *Journal of Fish Diseases*.  
953 2006;29:371–4.
- 954 64. Munck A, Guyre PM, Holbrook NJ. Physiological Functions of Glucocorticoids in Stress  
955 and Their Relation to Pharmacological Actions. *Endocr Rev. Oxford Academic*; 1984;5:25–  
956 44.
- 957 65. Johnson EO, Kamilaris TC, Chrousos GP, Gold PW. Mechanisms of stress: A dynamic

- 958 overview of hormonal and behavioral homeostasis. *Neuroscience & Biobehavioral Reviews*.  
959 1992;16:115–30.
- 960 66. Wingfield JC, Romero ML. Adrenocortical responses to stress and their modulation in  
961 free-living vertebrates. *Comprehensive physiology*. 2011;211–34.
- 962 67. Kulczykowska EZ. Stress response system in the fish skin - welfare measures revisited.  
963 *Front Physiol*. 2019;10:In press.
- 964 68. Li C, Yao C-L. Molecular and expression characterizations of interleukin-8 gene in large  
965 yellow croaker (*Larimichthys crocea*). *Fish & Shellfish Immunology*. 2013;34:799–809.
- 966 69. Basu M, Swain B, Maiti NK, Routray P, Samanta M. Inductive expression of toll-like  
967 receptor 5 (TLR5) and associated downstream signaling molecules following ligand exposure  
968 and bacterial infection in the Indian major carp, mrigal (*Cirrhinus mrigala*). *Fish & Shellfish*  
969 *Immunology*. 2012;32:121–31.
- 970 70. Palti Y. Toll-like receptors in bony fish: From genomics to function. *Developmental &*  
971 *Comparative Immunology*. 2011;35:1263–72.
- 972 71. Holland MCH, Lambris JD. The complement system in teleosts. *Fish & Shellfish*  
973 *Immunology*. 2002;12:399–420.
- 974 72. Sunyer JO, Tort L, Lambris JD. Diversity of the third form of complement, C3, in fish:  
975 functional characterization of five forms of C3 in the diploid fish *Sparus aurata*. *Biochemical*  
976 *Journal*. 1997;326:877–81.
- 977 73. Xia X, Wang X, Qin W, Jiang J, Cheng L. Emerging regulatory mechanisms and  
978 functions of autophagy in fish. *Aquaculture*. 2019;511:734212.
- 979 74. Ellis AE. Immunity to bacteria in fish. *Fish & Shellfish Immunology*. 1999;9:291–308.
- 980 75. Ganz T, Nemeth E. Iron homeostasis in host defence and inflammation. *Nat Rev*



- 981 Immunol. 2015;15:500–10.
- 982 76. Dalmo RA, Bøgwald J.  $\beta$ -glucans as conductors of immune symphonies. Fish & Shellfish  
983 Immunology. 2008;25:384–96.
- 984 77. Petit J, Bailey EC, Wheeler RT, de Oliveira CAF, Forlenza M, Wiegertjes GF. Studies  
985 Into  $\beta$ -Glucan Recognition in Fish Suggests a Key Role for the C-Type Lectin Pathway. Front  
986 Immunol. Frontiers; 2019;10.
- 987 78. Decostere A, Haesebrouck F, Van Driessche E, Charlier G, Ducatelle R. Characterization  
988 of the adhesion of *Flavobacterium columnare* (*Flexibacter columnaris*) to gill tissue. J Fish  
989 Diseases. 1999;22:465–74.
- 990 79. Ji L, Sun G, Li J, Wang Y, Du Y, Li X, et al. Effect of dietary  $\beta$ -glucan on growth,  
991 survival and regulation of immune processes in rainbow trout (*Oncorhynchus mykiss*) infected  
992 by *Aeromonas salmonicida*. Fish Shellfish Immunol. 2017;64:56–67.
- 993 80. Douxfils J, Fierro-Castro C, Mandiki SNM, Emile W, Tort L, Kestemont P. Dietary  $\beta$ -  
994 glucans differentially modulate immune and stress-related gene expression in lymphoid  
995 organs from healthy and *Aeromonas hydrophila*-infected rainbow trout (*Oncorhynchus*  
996 *mykiss*). Fish Shellfish Immunol. 2017;63:285–96.
- 997 81. Liu F, Weng D, Chen Y, Song L, Li C, Dong L, et al. Depletion of CD4+CD25+Foxp3+  
998 regulatory T cells with anti-CD25 antibody may exacerbate the 1,3- $\beta$ -glucan-induced lung  
999 inflammatory response in mice. Arch Toxicol. 2011;85:1383–94.
- 1000 82. Secombes CJ, Wang T. The innate and adaptive immune system of fish. Infectious  
1001 Disease in Aquaculture, Prevention and Control. Woodhead Publishing. Oxford, Cambridge,  
1002 Philadelphia, New Delhi: Elsevier; 2012. p. 3–68.
- 1003 83. Zhu J, Paul WE. Heterogeneity and plasticity of T helper cells. Cell Res. 2010;20:4–12.

- 1004 84. Wang T, Secombes CJ. The cytokine networks of adaptive immunity in fish. *Fish &*  
1005 *Shellfish Immunology*. 2013;35:1703–18.
- 1006 85. Matheu MP, Othy S, Greenberg ML, Dong TX, Schuijs M, Deswarte K, et al. Imaging  
1007 regulatory T cell dynamics and suppression of T cell priming mediated by CTLA4. *Nat*  
1008 *Commun*. 2015;6:6219.
- 1009 86. Weis WI, Taylor ME, Drickamer K. The C-type lectin superfamily in the immune system.  
1010 *Immunological Reviews*. 1998;163:19–34.
- 1011 87. Shishido SN, Varahan S, Yuan K, Li X, Fleming SD. Humoral innate immune response  
1012 and disease. *Clin Immunol*. 2012;144:142–58.
- 1013 88. Smani Y, McConnell MJ, Pachón J. Role of Fibronectin in the Adhesion of *Acinetobacter*  
1014 *baumannii* to Host Cells. *PLOS ONE*. Public Library of Science; 2012;7:e33073.
- 1015 89. Mosher D. Targeting the bacterial-host interaction. *Virulence*. 2012;3:349–50.
- 1016 90. Beck BH, Farmer BD, Straus DL, Li C, Peatman E. Putative roles for a rhamnose binding  
1017 lectin in *Flavobacterium columnare* pathogenesis in channel catfish *Ictalurus punctatus*. *Fish*  
1018 *& Shellfish Immunology*. 2012;33:1008–15.
- 1019 91. Mally M, Shin H, Paroz C, Landmann R, Cornelis GR. *Capnocytophaga canimorsus*: A  
1020 Human Pathogen Feeding at the Surface of Epithelial Cells and Phagocytes. Cheung A,  
1021 editor. *PLoS Pathog*. 2008;4:e1000164.
- 1022 92. Abdelhamed H, Lawrence ML, Karsi A. The Role of TonB Gene in *Edwardsiella ictaluri*  
1023 *Virulence*. *Front Physiol*. 2017;8:1066.
- 1024 93. Hebrard M, Viala JPM, Meresse S, Barras F, Aussel L. Redundant Hydrogen Peroxide  
1025 Scavengers Contribute to *Salmonella Virulence* and Oxidative Stress Resistance. *Journal of*  
1026 *Bacteriology*. 2009;191:4605–14.

- 1027 94. Cassat JE, Skaar EP. Iron in Infection and Immunity. *Cell Host Microbe*. 2013;13:509–19.
- 1028 95. Choby JE, Skaar EP. Heme Synthesis and Acquisition in Bacterial Pathogens. *J Mol Biol*.  
1029 2016;428:3408–28.
- 1030 96. Passalacqua KD, Charbonneau M-E, O’Riordan MXD. Bacterial metabolism shapes the  
1031 host:pathogen interface. *Microbiol Spectr*. 2016;4.
- 1032 97. Close B, Banister K, Baumans V, Bernoth E-M, Bromage N, Bunyan J, et al.  
1033 Recommendations for euthanasia of experimental animals: Part 2. :32.
- 1034 98. Kilkenny C, Browne W, Cuthill IC, Emerson M, Altman DG. Animal research: Reporting  
1035 in vivo experiments: The ARRIVE guidelines: Animal research: reporting in vivo  
1036 experiments the ARRIVE guidelines. *British Journal of Pharmacology*. 2010;160:1577–9.
- 1037
